# Supplementary material for: Genetic Aspects and Molecular Testing in Prostate Cancer: A Report from a Dutch Multidisciplinary Consensus Meeting
Source: PubMed Central journal article supplement (PMC9975012; doi:10.1016/j.euros.2022.11.011), 2023-01-25

# SUPPLEMENTARY MATERIALS

1. (Inter)national recommendations for germline and tumour genetic testing in PCa
2. Scenarios & consensus questions

(Inter)national recommendations for germline and tumour genetic testing in prostate cancer

# Guidelines: EAU and ESMO

|          | Germline testing                                                                                                                                                                                                                                                                                                                                                                                                                        | Tumour genetic testing                                                                    |
|----------|-----------------------------------------------------------------------------------------------------------------------------------------------------------------------------------------------------------------------------------------------------------------------------------------------------------------------------------------------------------------------------------------------------------------------------------------|-------------------------------------------------------------------------------------------|
| EAU [1]  | <p>Consider for:</p> <ul style="list-style-type: none"> <li>Men with metastatic Pca</li> <li>Men with high-risk PCa and family member diagnosed with PCa at age &lt;60 year</li> <li>Men with multiple family members diagnosed with PCa at age &lt;60 year or a family member who died of Pca</li> <li>Men with family history of high-risk germline mutations or family history of multiple cancers on same side of family</li> </ul> | Should be offered to mCRPC patients for testing of HRR as well as MMR deficiencies or MSI |
| ESMO [2] | <ul style="list-style-type: none"> <li>Recommend for <i>BRCA2</i> and other DDR genes associated with cancer predisposition syndromes in patients with a family history of cancer</li> <li>Consider in all patients with metastatic PCa</li> <li>Patients with pathogenic mutations in cancer-risk genes identified through tumour testing should be referred for germline testing and genetic counselling</li> </ul>                   | Consider in mCRPC patients for testing of HRR genes and MRR defects or MSI                |

1. Mottet N, Cornford P, van den Bergh RCN, et al. EAU - EANM - ESTRO - ESUR - ISUP -SIOG guidelines on prostate cancer. Available at: <https://uroweb.org/guidelines/prostate-cancer/>.
2. Parker C, Castro E, Fizazi K, et al. Prostate cancer: ESMO clinical practice guidelines for diagnosis, treatment and follow-up. Ann Oncol 2020;31:1119-34.

# Guidelines: NCCN and Dutch

|           | Germline testing                                                                                                                                                                                                                                                                                                                                                                                                                                                                                                                                                                                                                                                                                                                                                                                                                                                                                                                                                                                                                                                                                                                                                                                                                                                                                                                                                                                                                                | Tumour genetic testing                                                                                                                                                                                                                                                                                                                                                                                                                                |
|-----------|-------------------------------------------------------------------------------------------------------------------------------------------------------------------------------------------------------------------------------------------------------------------------------------------------------------------------------------------------------------------------------------------------------------------------------------------------------------------------------------------------------------------------------------------------------------------------------------------------------------------------------------------------------------------------------------------------------------------------------------------------------------------------------------------------------------------------------------------------------------------------------------------------------------------------------------------------------------------------------------------------------------------------------------------------------------------------------------------------------------------------------------------------------------------------------------------------------------------------------------------------------------------------------------------------------------------------------------------------------------------------------------------------------------------------------------------------|-------------------------------------------------------------------------------------------------------------------------------------------------------------------------------------------------------------------------------------------------------------------------------------------------------------------------------------------------------------------------------------------------------------------------------------------------------|
| NCCN [1]  | <p>Recommend for:</p> <ul style="list-style-type: none"> <li>High-risk, very high-risk, regional or metastatic PCa regardless of family history and age of diagnosis</li> <li>PCa and Ashkenazi Jewish ancestry</li> <li>PCa and known family history of high-risk germline mutations</li> <li>PCa and positive family history of cancer               <ul style="list-style-type: none"> <li>≥1 first-, second-, or third-degree relative with:                   <ul style="list-style-type: none"> <li>at age ≤50 year: breast, colorectal or endometrial cancer</li> <li>at any age: male breast cancer, ovarian, exocrine pancreatic, or (very) high-risk, regional or metastatic PCa</li> </ul> </li> <li>≥1 first-degree relative with PCa at age ≤60 year</li> <li>≥2 first-, second-, or third-degree relatives with breast or prostate cancer at any age</li> <li>≥3 first- or second-degree relatives with Lynch syndrome-related cancers, especially if diagnosed at age &lt;50 years</li> </ul> </li> <li>PCa and personal history of breast cancer</li> </ul> <p>Consider for:</p> <ul style="list-style-type: none"> <li>Intermediate-risk PCa and intraductal/cribriform histology</li> <li>PCa and personal history of some other cancers</li> </ul> <p>Genes:</p> <ul style="list-style-type: none"> <li><i>MLH1, MSH2, MSH6, PMS2, BRCA1, BRCA2, ATM, PALB2, CHEK2</i> &amp; others depending on clinical context</li> </ul> | <p>Recommend:</p> <ul style="list-style-type: none"> <li>DDR genes in patients with metastatic PCa (<i>BRCA1, BRCA2, ATM, PALB2, FANCA, RAD51D, CHEK2, CDK12</i>)</li> <li>MSI or MMR genes in patients with mCRPC</li> </ul> <p>Consider:</p> <ul style="list-style-type: none"> <li>DDR genes in patients with regional PCa</li> <li>MSI or MMR genes in patients with regional PCa or mHSPC</li> <li>TMB testing in patients with mCRPC</li> </ul> |
| Dutch [2] | <p>Consider for patient with PCa (Gleason score ≥7) and:</p> <ul style="list-style-type: none"> <li>First- or second-degree relative with breast cancer diagnosed at age ≤50 years, or ovarian cancer, or pancreatic cancer</li> <li>Ashkenazi Jewish ancestry</li> </ul>                                                                                                                                                                                                                                                                                                                                                                                                                                                                                                                                                                                                                                                                                                                                                                                                                                                                                                                                                                                                                                                                                                                                                                       | None                                                                                                                                                                                                                                                                                                                                                                                                                                                  |

1. Schaeffer EM, Srinivas S, Antonarakis ES, et al. NCCN Clinical Practice Guidelines in Oncology – Prostate Cancer v3.2022. Available at: <https://www.nccn.org/guidelines/guidelines-detail?category=1&id=1459>.

2. Vasen HFA, Hes FJ, de Jong MM, et al. Erfelijke tumoren: richtlijnen voor diagnostiek en preventie 2017. 6e druk. Leiden: Stichting Opsporing Erfelijke Tumoren (STOET)/Vereniging Klinische Genetica Nederland (VKGN); 2017. Update 2022; preliminary version ahead of publication made available by M. Ausems.

# Scenarios & consensus questions

# Scenario 1

45-year-old man, concerned if he has or will get PCa

- No urological signs/symptoms
- PSA <1 ng/ml
- Normal DRE
- Family history:
  - Father died at age 64 of metastatic PCa (diagnosis at age 55, Gleason score 8)
  - Brother diagnosed with high-risk localised PCa (Gleason score 7) at age 50
  - No other cancer in the family

PCa = prostate cancer

PSA = prostate-specific antigen

DRE = digital rectal examination

# Question 1

How appropriate do you consider the following options for this patient?

| Options                                                 | Appropriateness<br>(median score) <sup>1</sup> | Can't judge<br>(%) <sup>2</sup> |
|---------------------------------------------------------|------------------------------------------------|---------------------------------|
| No further steps                                        | 2.0                                            | 5                               |
| Referral to clinical geneticist for genetic counselling | 4.0*                                           | 5                               |
| Germline genetic testing for the man                    | 2.0                                            | 10                              |
| Follow-up by PSA                                        | 8.0                                            | 8                               |
| Follow-up by PSA and mpMRI                              | 2.0                                            | 18                              |

<sup>1</sup> Score on a 9-point scale: 1-3 inappropriate (red), 4-6 uncertain or disagreement (yellow), 7-9 appropriate (green)

<sup>2</sup> Total number of respondents=39

\*Disagreement: at least one-third of the scores in each of the sections 1-3 and 7-9

## Scenario 2 (same case with changes marked in yellow)

45-year-old man, concerned if he has or will get PCa

- No urological signs/symptoms
- PSA <1 ng/ml
- Normal DRE
- Family history:
  - Father died at age 64 of metastatic PCa (diagnosis at age 55, Gleason score 8)
  - Brother diagnosed with high-risk localised PCa (Gleason score 7) at age 50
  - Sister diagnosed with ovarian cancer at the age of 55

PCa = prostate cancer

PSA = prostate-specific antigen

DRE = digital rectal examination



## Question 2

How appropriate do you consider the following options for this patient?

| Options                                                 | Appropriateness<br>(median score) <sup>1</sup> | Can't judge<br>(%) <sup>2</sup> |
|---------------------------------------------------------|------------------------------------------------|---------------------------------|
| No further steps                                        | 2.0                                            | 5                               |
| Referral to clinical geneticist for genetic counselling | 8.0                                            | 5                               |
| Germline genetic testing for the man                    | 6.0                                            | 10                              |
| Follow-up by PSA                                        | 8.0                                            | 8                               |
| Follow-up by PSA and mpMRI                              | 2.0                                            | 21                              |

<sup>1</sup> Score on a 9-point scale: 1-3 inappropriate (red), 4-6 uncertain or disagreement (yellow), 7-9 appropriate (green)

<sup>2</sup> Total number of respondents=39

## Scenario 3 (same case with changes marked in yellow)

45-year-old man, concerned if he has or will get PCa

- No urological signs/symptoms
- PSA <1 ng/ml
- Normal DRE
- Family history:
  - Father died at age 64 of metastatic PCa (diagnosis at age 55, Gleason score 8)
  - Brother diagnosed with high-risk localised PCa (Gleason score 7) at age 50
  - Sister diagnosed with ovarian cancer at the age of 55 (BRCA2 germline (L)PV)
  - The man is carrier of the same BRCA2 germline (L)PV

PCa = prostate cancer  
PSA = prostate-specific antigen

DRE = digital rectal examination  
(L)PV = (likely) pathogenic variant

# Question 3

How appropriate do you consider the following options for this patient?

| Options                    | Appropriateness<br>(median score) <sup>1</sup> | Can't judge<br>(%) <sup>2</sup> |
|----------------------------|------------------------------------------------|---------------------------------|
| No further steps           | 1.0                                            | 5                               |
| Follow-up by PSA           | 8.0                                            | 8                               |
| Follow-up by PSA and mpMRI | 4.0*                                           | 28                              |

<sup>1</sup> Score on a 9-point scale: 1-3 inappropriate (red), 4-6 uncertain or disagreement (yellow), 7-9 appropriate (green)

<sup>2</sup> Total number of respondents=39

\*Disagreement: at least one-third of the scores in each of the sections 1-3 and 7-9

## Scenario 4 (same case with changes marked in yellow)

45-year-old man, concerned if he has or will get PCa

- No urological signs/symptoms
- PSA <1 ng/ml
- Normal DRE
- Family history:
  - Father died at age 64 of metastatic PCa (diagnosis at age 55, Gleason score 8)
  - Brother diagnosed with high-risk localised PCa (Gleason score 7) at age 50
  - Sister diagnosed with breast cancer at the age of 45 and an ATM germline (L)PV

PCa = prostate cancer  
PSA = prostate-specific antigen

DRE = digital rectal examination  
(L)PV = (likely) pathogenic variant

# Question 4

How appropriate do you consider the following options for this patient?

| Options                                           | Appropriateness<br>(median score) <sup>1</sup> | Can't judge<br>(%) <sup>2</sup> |
|---------------------------------------------------|------------------------------------------------|---------------------------------|
| No further steps                                  | 1.0                                            | 5                               |
| Germline genetic testing for the man <sup>3</sup> | 7.0                                            | 10                              |
| Follow-up by PSA                                  | 8.0                                            | 8                               |
| Follow-up by PSA and mpMRI                        | 3.0                                            | 23                              |

<sup>1</sup> Score on a 9-point scale: 1-3 inappropriate (red), 4-6 uncertain or disagreement (yellow), 7-9 appropriate (green)

<sup>2</sup> Total number of respondents=39

<sup>3</sup> Especially important for the female relatives of the man

# Scenario 5

66-year-old man

- Diagnosed with low-risk PCa (PSA 5.4 ng/ml, Gleason score 6 on targeted biopsy, cT2a)
- ECOG PS: 0
- Family history:
  - Brother 1: diagnosis high-risk localised PCa at age 58 (PSA 18 ng/ml, Gleason score 8, cT2c)
  - Brother 2: diagnosis de novo mHSPC at age 67 (PSA 182 ng/ml, Gleason score 8, and 5 bone metastases), carrier of a BRCA2 tumour (L)PV

ECOG PS: Eastern Cooperative Oncology Group performance status

(L)PV = (likely) pathogenic variant

mHSPC = metastatic hormone-sensitive prostate cancer

## Question 5

How appropriate do you consider the following options for this patient?

| Options                                                    | Appropriateness<br>(median score) <sup>1</sup> | Can't judge<br>(%) <sup>2</sup> |
|------------------------------------------------------------|------------------------------------------------|---------------------------------|
| Referral to clinical geneticist & germline genetic testing | 3.0                                            | 5                               |
| Tumour genetic testing                                     | 2.0                                            | 8                               |
| Active surveillance                                        | 8.0                                            | 8                               |
| Active treatment (surgery/radiotherapy)                    | 5.0                                            | 21                              |

<sup>1</sup> Score on a 9-point scale: 1-3 inappropriate (red), 4-6 uncertain or disagreement (yellow), 7-9 appropriate (green)

<sup>2</sup> Total number of respondents=39

## Scenario 6 (same case with changes marked in yellow)

66-year-old man

- Diagnosed with low-risk PCa (PSA 5.4 ng/ml, Gleason score 6 on targeted biopsy, cT2a)
- ECOG PS: 0
- Family history:
  - Brother 1: diagnosis high-risk localised PCa at age 58 (PSA 18 ng/ml, Gleason score 8, cT2c)
  - Brother 2: diagnosis de novo mHSPC at age 67 (PSA 182 ng/ml, Gleason score 8, and 5 bone metastases), carrier of a BRCA2 **germline** (L)PV

ECOG PS: Eastern Cooperative Oncology Group performance status

(L)PV = (likely) pathogenic variant

mHSPC = metastatic hormone-sensitive prostate cancer



## Question 6

How appropriate do you consider the following options for this patient?

| Options                                                    | Appropriateness<br>(median score) <sup>1</sup> | Can't judge<br>(%) <sup>2</sup> |
|------------------------------------------------------------|------------------------------------------------|---------------------------------|
| Referral to clinical geneticist & germline genetic testing | 8.0                                            | 8                               |
| Tumour genetic testing                                     | 2.0                                            | 15                              |
| Active surveillance                                        | 7.0                                            | 13                              |
| Active treatment (surgery/radiotherapy)                    | 5.5                                            | 28                              |

<sup>1</sup> Score on a 9-point scale: 1-3 inappropriate (red), 4-6 uncertain or disagreement (yellow), 7-9 appropriate (green)

<sup>2</sup> Total number of respondents=39

## Scenario 7 (same case with changes marked in yellow)

66-year-old man

- Diagnosed with low-risk PCa (PSA 5.4 ng/ml, Gleason score 6 on targeted biopsy, cT2a)
- ECOG PS: 0
- Family history:
  - Brother 1: diagnosis high-risk localised PCa at age 58 (PSA 18 ng/ml, Gleason score 8, cT2c)
  - Brother 2: diagnosis de novo mHSPC at age 67 (PSA 182 ng/ml, Gleason score 8, and 5 bone metastases), carrier of a BRCA2 germline (L)PV
- Patient is also carrier of the same BRCA2 germline (L)PV

ECOG PS: Eastern Cooperative Oncology Group performance status

(L)PV = (likely) pathogenic variant

mHSPC = metastatic hormone-sensitive prostate cancer

## Question 7

How appropriate do you consider the following options for this patient?

| Options                                 | Appropriateness<br>(median score) <sup>1</sup> | Can't judge<br>(%) <sup>2</sup> |
|-----------------------------------------|------------------------------------------------|---------------------------------|
| Active surveillance                     | 6.0                                            | 15                              |
| Active treatment (surgery/radiotherapy) | 7.0                                            | 23                              |

<sup>1</sup> Score on a 9-point scale: 1-3 inappropriate (red), 4-6 uncertain or disagreement (yellow), 7-9 appropriate (green)

<sup>2</sup> Total number of respondents=39

## Scenario 8 (same case with changes marked in yellow)

66-year-old man

- Diagnosed with low-risk PCa (PSA 5.4 ng/ml, Gleason score 6 on targeted biopsy, cT2a)
- ECOG PS: 0
- Family history:
  - Brother 1: diagnosis high-risk localised PCa at age 58 (PSA 18 ng/ml, Gleason score 8, cT2c)
  - Brother 2: diagnosis de novo mHSPC at age 67 (PSA 182 ng/ml, Gleason score 8, and 5 bone metastases), carrier of a BRCA2 germline (L)PV
- Patient is **not a carrier** of the same BRCA2 germline (L)PV

ECOG PS: Eastern Cooperative Oncology Group performance status

(L)PV = (likely) pathogenic variant

mHSPC = metastatic hormone-sensitive prostate cancer

## Question 8

How appropriate do you consider the following options for this patient?

| Options                                 | Appropriateness<br>(median score) <sup>1</sup> | Can't judge<br>(%) <sup>2</sup> |
|-----------------------------------------|------------------------------------------------|---------------------------------|
| Active surveillance                     | 8.0                                            | 13                              |
| Active treatment (surgery/radiotherapy) | 3.0                                            | 26                              |

<sup>1</sup> Score on a 9-point scale: 1-3 inappropriate (red), 4-6 uncertain or disagreement (yellow), 7-9 appropriate (green)

<sup>2</sup> Total number of respondents=39

# Scenario 9

64-year-old man, diagnosed with M0 PCa

- ECOG Performance Status: 0
- No relevant comorbidities
- No relevant family history of cancer

# Question 9

When is germline genetic testing in this patient recommended? [multiple answers allowed]

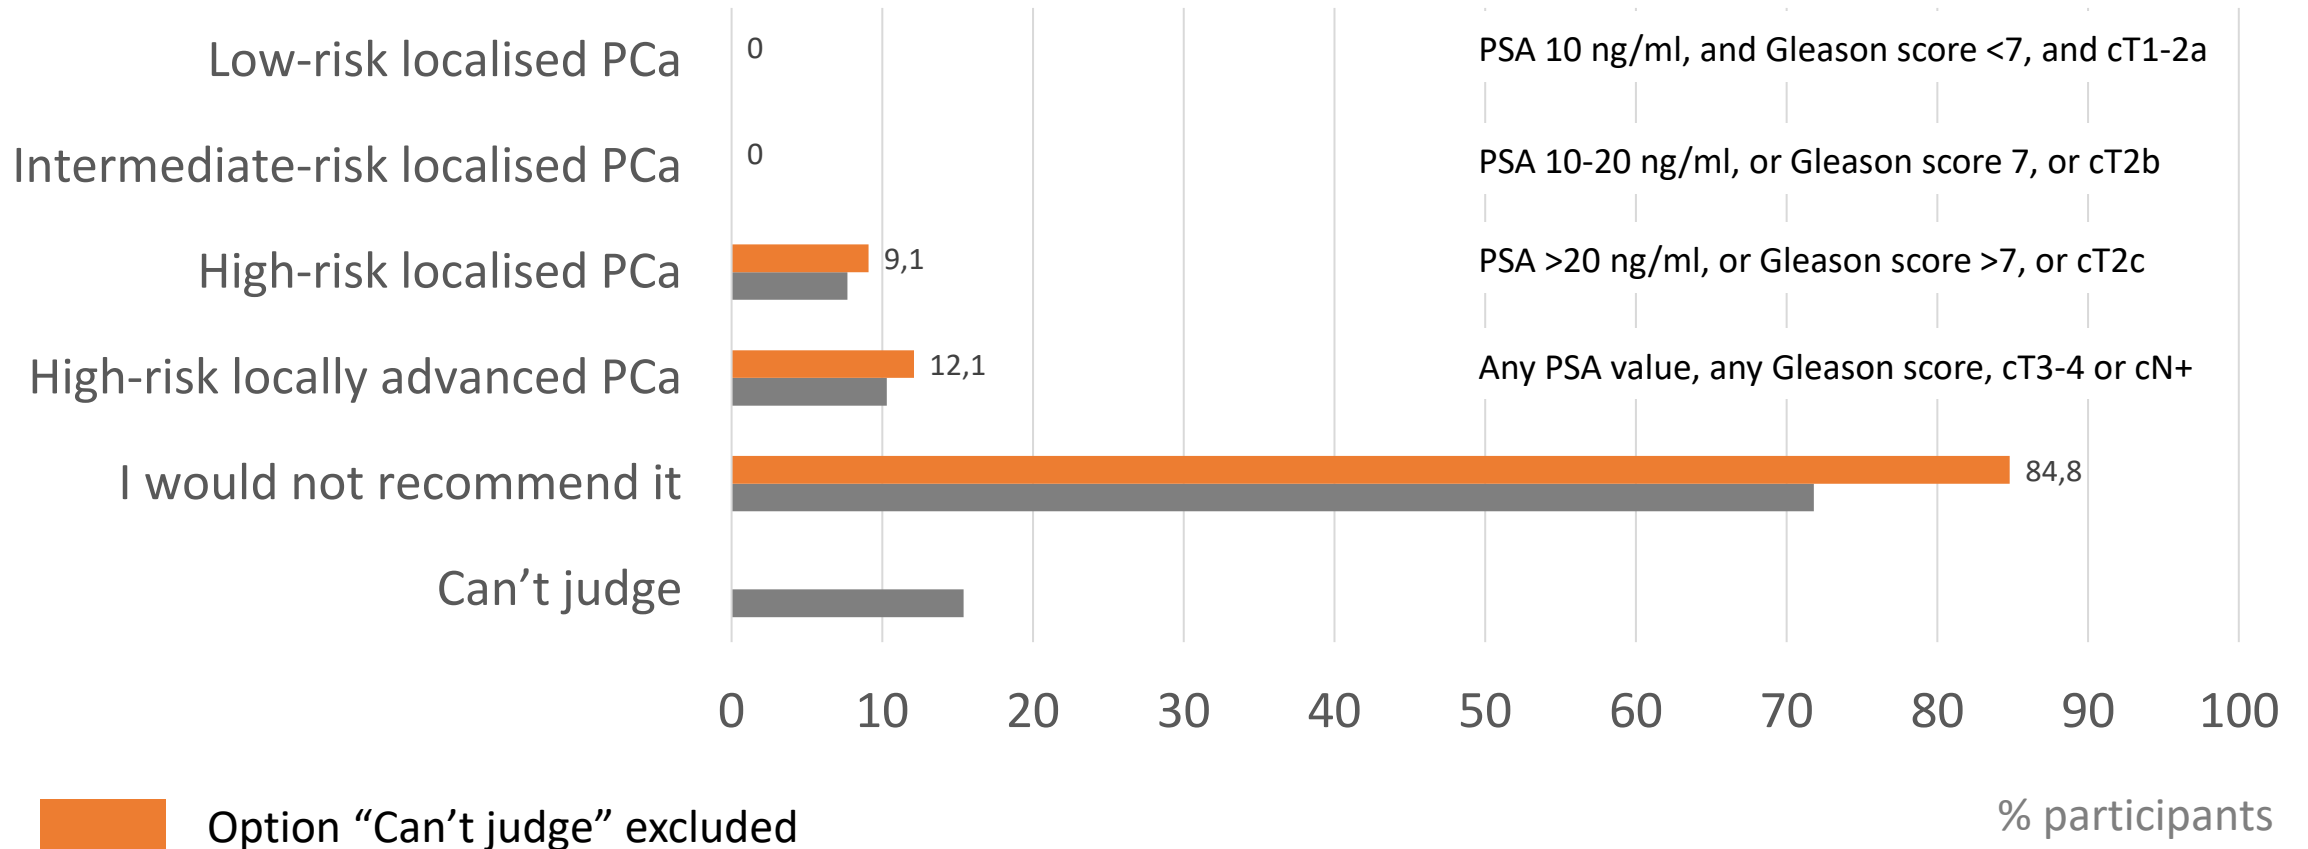

# Question 10

When is tumour genetic testing in this patient recommended? [multiple answers allowed]

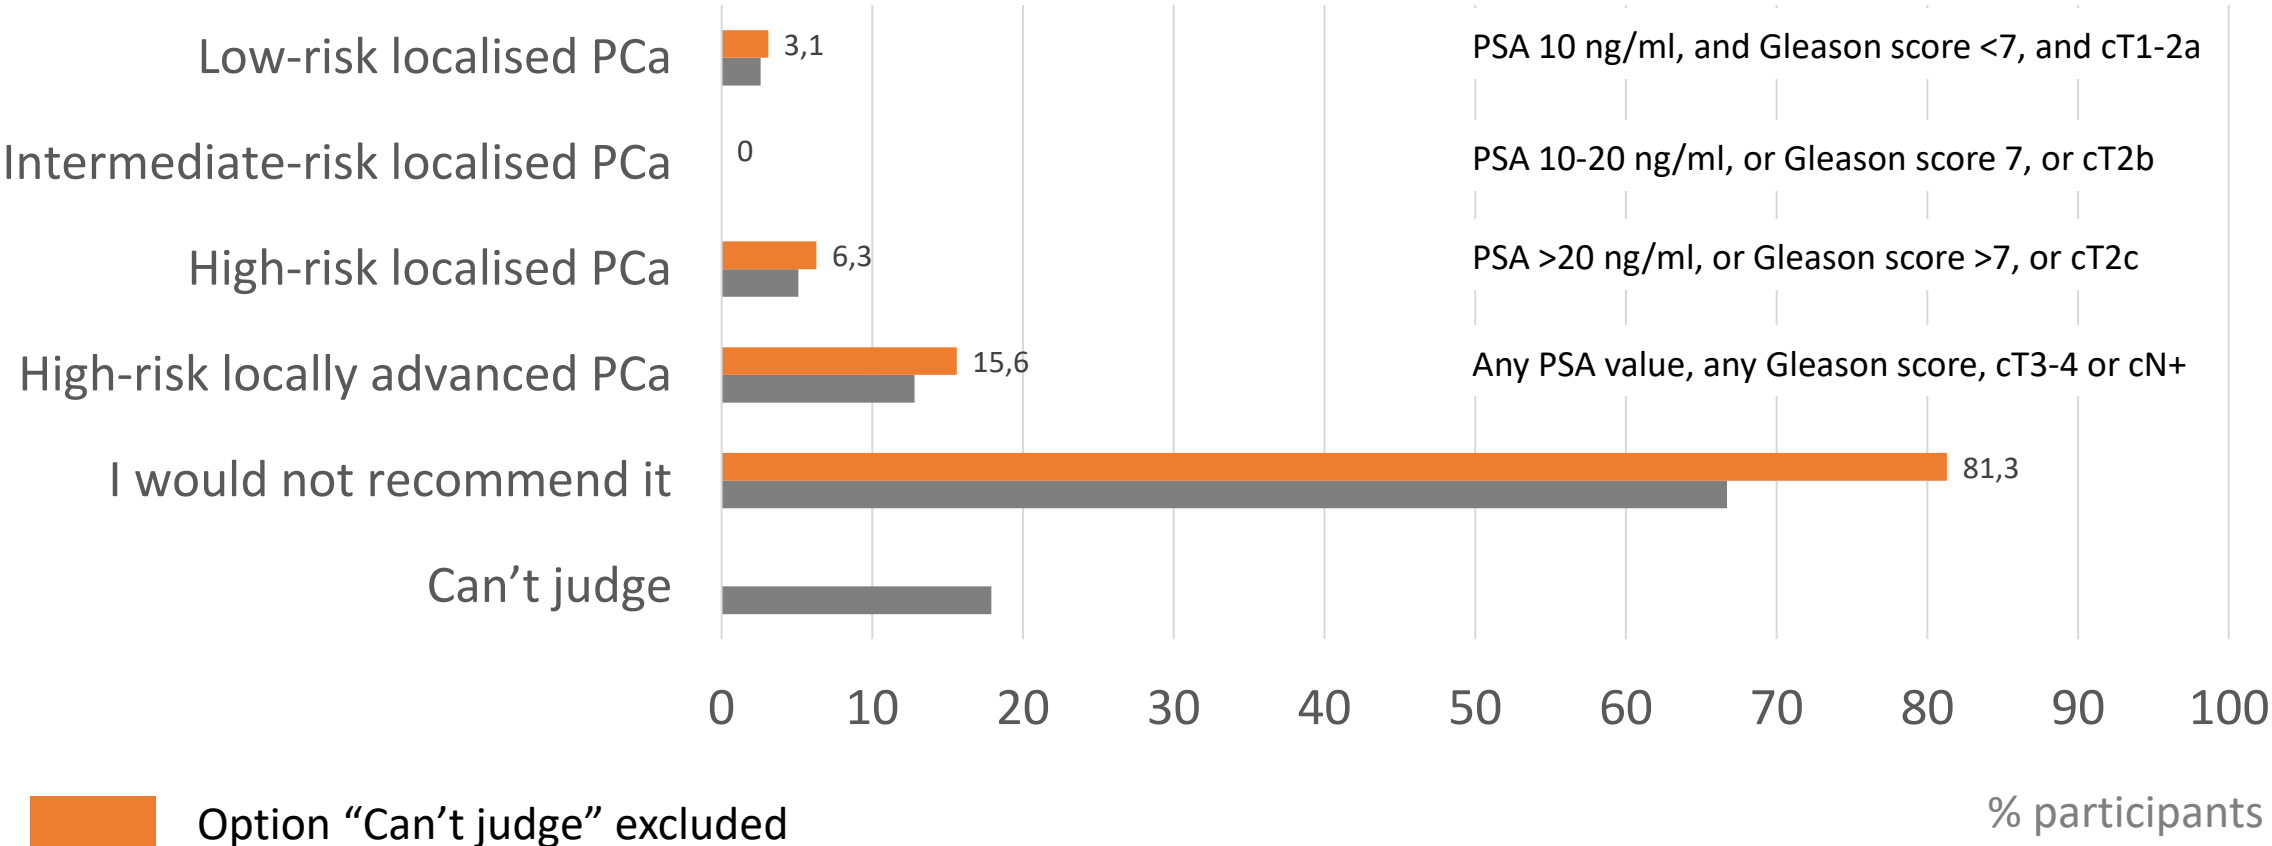

% participants



# Question 11

How appropriate do you consider germline genetic testing in patients with M0 PCa in the following situations?

| Situations                                                              | Appropriateness<br>(median score) | Can't judge<br>(%) |
|-------------------------------------------------------------------------|-----------------------------------|--------------------|
| ≥cT3 stage                                                              | 2.0                               | 15                 |
| cN+                                                                     | 2.0                               | 15                 |
| Gleason score 7                                                         | 2.0                               | 15                 |
| Gleason score 8-10                                                      | 3.0                               | 15                 |
| Intraductal/cribriform pathology                                        | 2.0                               | 21                 |
| PSA >20 ng/ml                                                           | 2.0                               | 21                 |
| PCa family history                                                      | 5.5                               | 18                 |
| Other tumours in the family (pancreas, ovarium, breast at age <50 year) | 7.5                               | 13                 |

## Question 12

How appropriate do you consider tumour genetic testing in patients with M0 PCa in the following situations?

| Situations                                                              | Appropriateness<br>(median score) | Can't judge<br>(%) |
|-------------------------------------------------------------------------|-----------------------------------|--------------------|
| ≥cT3 stage                                                              | 2.0                               | 23                 |
| cN+                                                                     | 2.0                               | 26                 |
| Gleason score 7                                                         | 1.0                               | 26                 |
| Gleason score 8-10                                                      | 3.0                               | 26                 |
| Intraductal/cribriform pathology                                        | 2.0                               | 31                 |
| PSA >20 ng/ml                                                           | 2.0                               | 31                 |
| PCa family history                                                      | 2.0                               | 23                 |
| Other tumours in the family (pancreas, ovarium, breast at age <50 year) | 3.0*                              | 23                 |

\*Disagreement: at least one-third of the scores in each of the sections 1-3 and 7-9

# Scenario 10

70-year old man with metastatic hormone-sensitive PCa (mHSPC)

# Question 13

How appropriate do you consider germline testing in this patient with mHSPC in the following situations?

| Situations                     | Appropriateness (median score) <sup>1</sup> | Can't judge (%) <sup>2</sup> |
|--------------------------------|---------------------------------------------|------------------------------|
| De novo, M1a                   | 2.0                                         | 26                           |
| De novo, visceral metastases   | 3.0                                         | 26                           |
| De novo, high-volume (bone)    | 3.0                                         | 26                           |
| De novo, low-volume            | 2.0                                         | 33                           |
| Recurrent, M1a                 | 3.0                                         | 26                           |
| Recurrent, visceral metastases | 3.0                                         | 26                           |
| Recurrent, high-volume         | 3.0                                         | 26                           |
| Recurrent, low-volume          | 3.0                                         | 26                           |

<sup>1</sup> Score on a 9-point scale: 1-3 inappropriate (red), 4-6 uncertain or disagreement (yellow), 7-9 appropriate (green)

<sup>2</sup> Total number of respondents=39

# Question 14

How appropriate do you consider tumour genetic testing in this patient with mHSPC in the following situations?

| Situations                     | Appropriateness (median score) <sup>1</sup> | Can't judge (%) <sup>2</sup> |
|--------------------------------|---------------------------------------------|------------------------------|
| De novo, M1a                   | 3.0                                         | 28                           |
| De novo, visceral metastases   | 5.0                                         | 31                           |
| De novo, high-volume (bone)    | 4.0*                                        | 31                           |
| De novo, low-volume            | 4.0                                         | 33                           |
| Recurrent, M1a                 | 3.5                                         | 33                           |
| Recurrent, visceral metastases | 6.0                                         | 31                           |
| Recurrent, high-volume         | 5.0                                         | 31                           |
| Recurrent, low-volume          | 4.0                                         | 33                           |

<sup>1</sup> Score on a 9-point scale: 1-3 inappropriate (red), 4-6 uncertain or disagreement (yellow), 7-9 appropriate (green)

<sup>2</sup> Total number of respondents=39

\*Disagreement: at least one-third of the scores in each of the sections 1-3 and 7-9

# Question 15

How important is tumour genetic testing in patients with high-volume mHSPC (CHAARTED criteria) for:

| Aims                                                                      | Importance<br>(median score) <sup>1</sup> | Can't judge<br>(%) <sup>2</sup> |
|---------------------------------------------------------------------------|-------------------------------------------|---------------------------------|
| Detecting increased risk of other types of cancer in the patient          | 3.0                                       | 26                              |
| Therapeutic consequences for the patient                                  | 6.5                                       | 23                              |
| Detecting increased risk of other types of cancer in the patient's family | 3.5*                                      | 23                              |

<sup>1</sup> Score on a 9-point scale: 1-3 (very) unimportant (red), 4-6 uncertain or disagreement (yellow), 7-9 (very) important (green)

<sup>2</sup> Total number of respondents=39

\*Disagreement: at least one-third of the scores in each of the sections 1-3 and 7-9

## Question 16

How appropriate is further germline genetic testing in patients with high-volume mHSPC (CHAARTED criteria) and:

|                                            | Appropriateness<br>(median score) <sup>1</sup> | Can't judge<br>(%) <sup>2</sup> |
|--------------------------------------------|------------------------------------------------|---------------------------------|
| BRCA1/2 tumour (L)PV                       | 8.0                                            | 18                              |
| Non-BRCA1/2 tumour (L)PV (e.g. ATM, CHEK2) | 7.0                                            | 21                              |

<sup>1</sup> Score on a 9-point scale: 1-3 inappropriate (red), 4-6 uncertain or disagreement (yellow), 7-9 appropriate (green)

<sup>2</sup> Total number of respondents=39

# Question 17

Has the presence of a BRCA2 tumour (L)PV in a patient with de novo, low-volume mHSPC impact on the choice of your upfront treatment?

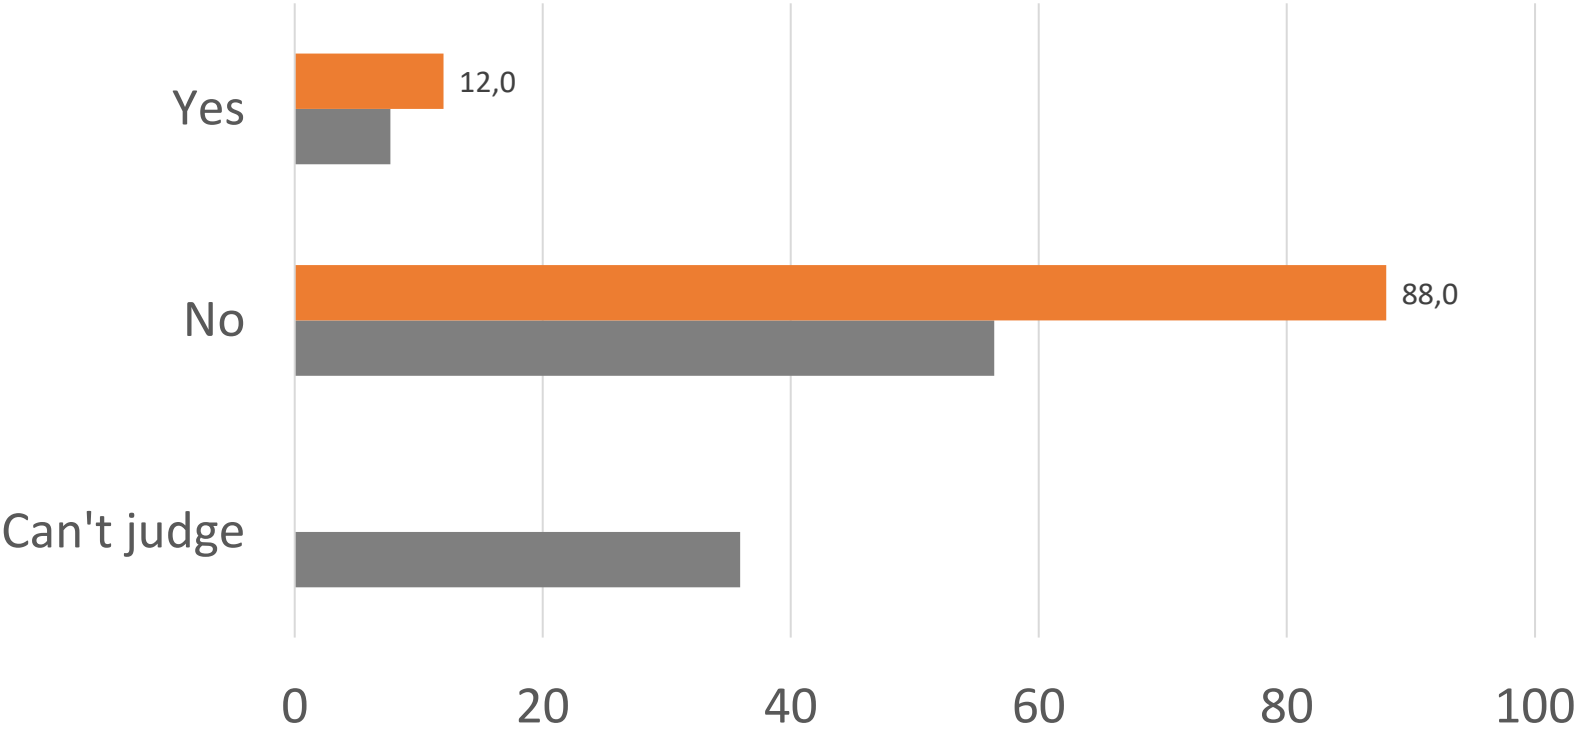

Option "Can't judge" excluded

% participants



# Question 18

Has the presence of a tumour (L)PV in a non-BRCA gene (e.g. CHEK2) in a patient with de novo, low-volume mHSPC impact on the choice of your upfront treatment?

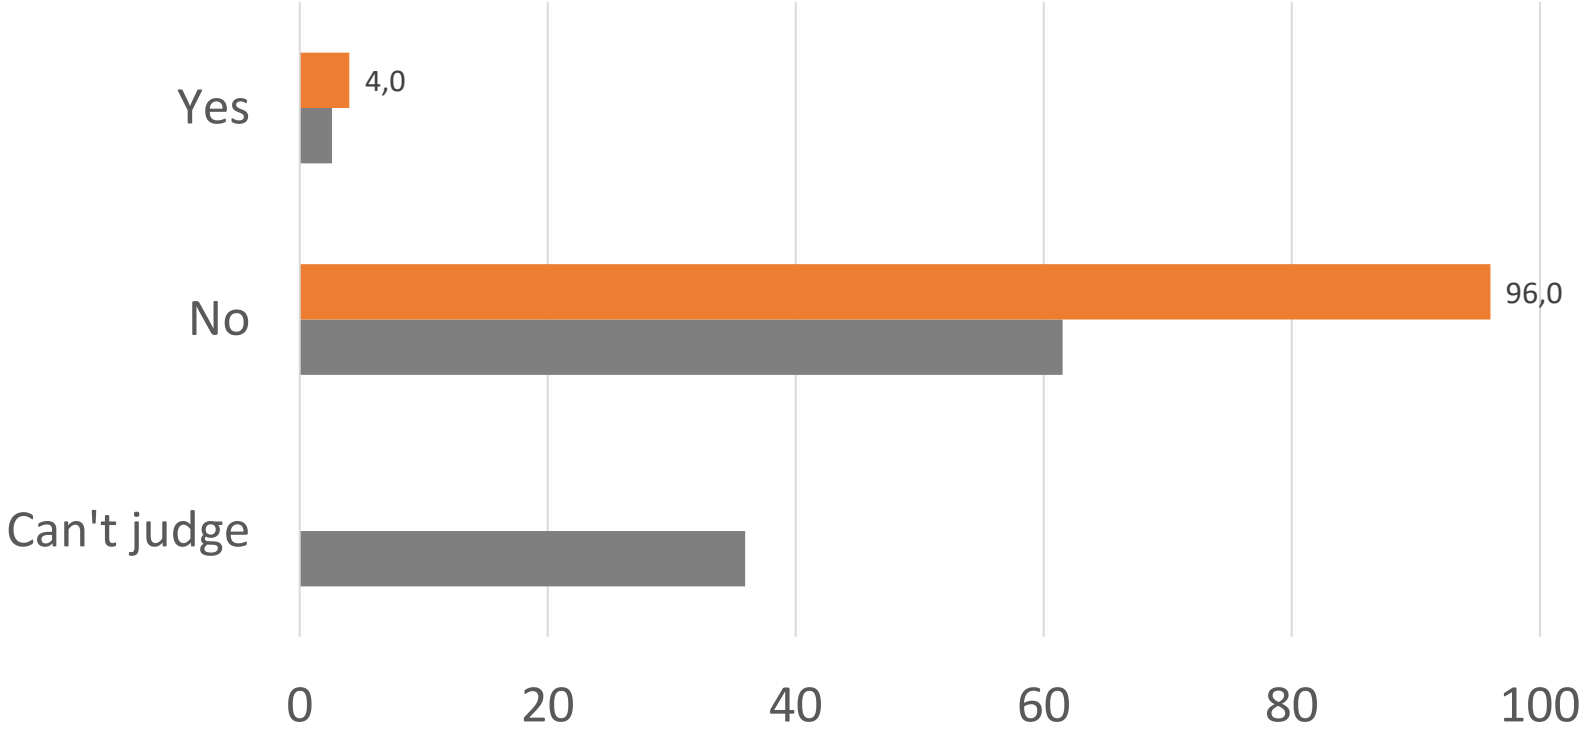

Option "Can't judge" excluded

% participants

# Question 19

Has the presence of a BRCA2 tumour (L)PV in a patient with de novo, high-volume mHSPC impact on the choice of your upfront treatment?

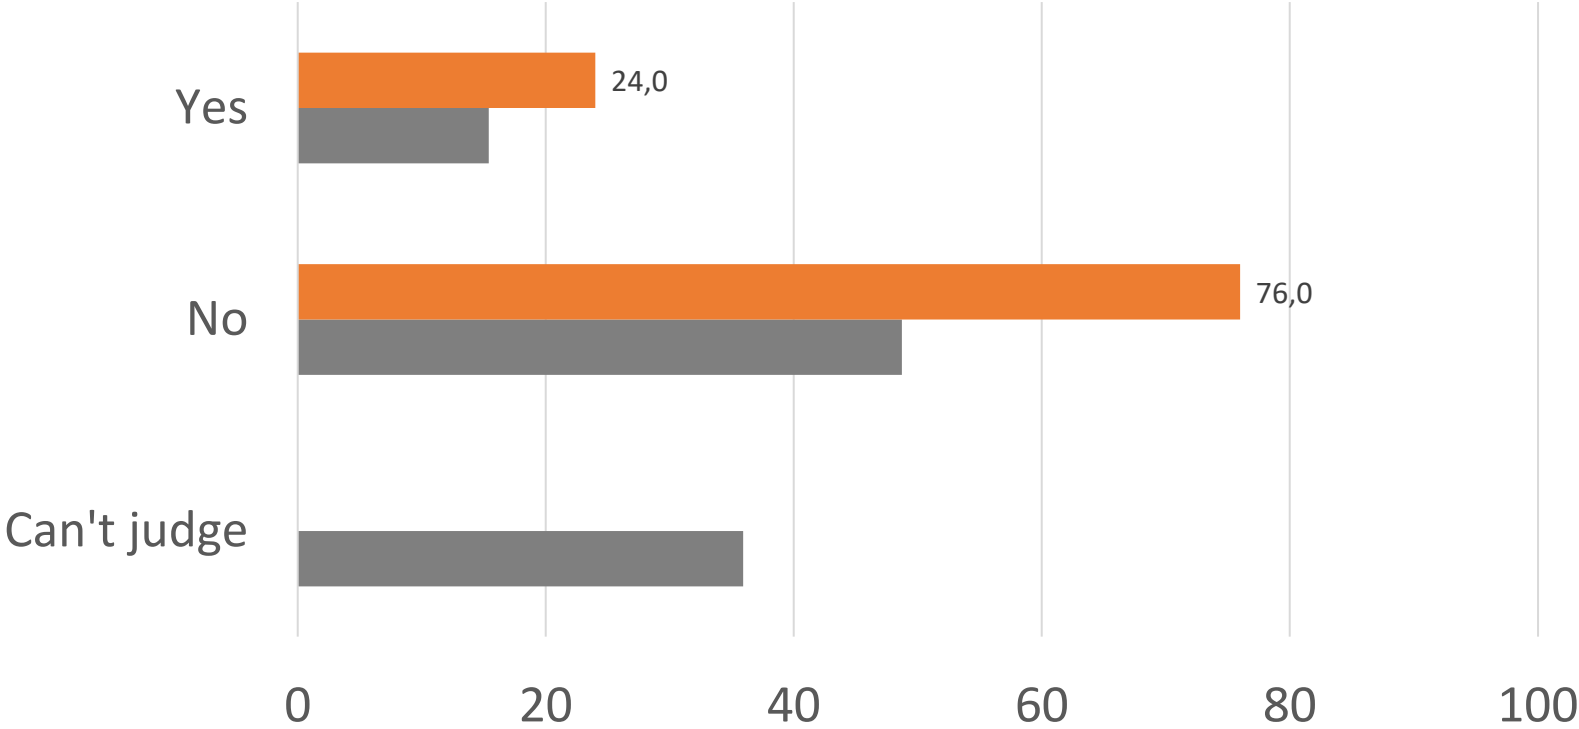

Option "Can't judge" excluded

% participants

# Question 20

In case a tumour genetic test is recommended for a patient with a primary diagnosis of mHSPC (de novo), then the following source of tissue is preferred:

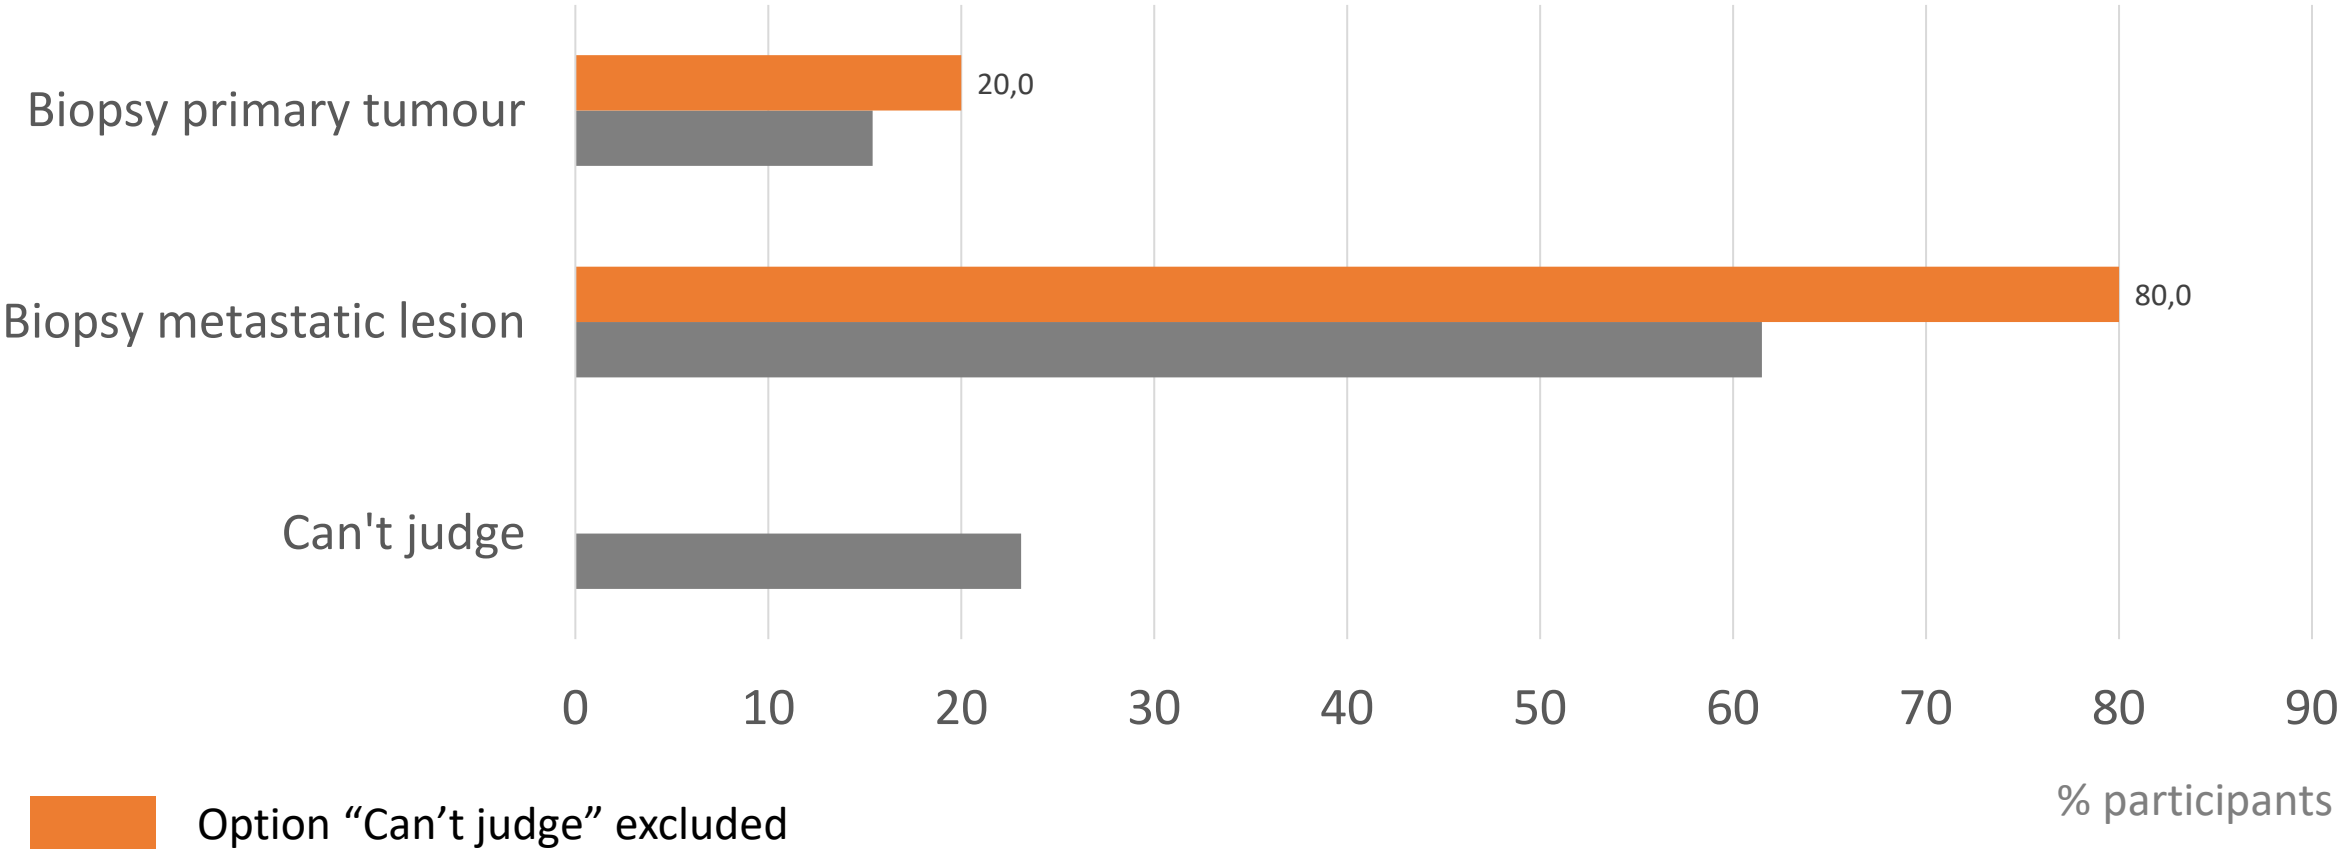

# Question 21

In case a tumour genetic test is recommended for a patient with progressive disease following curative treatment, then the following source of tissue is preferred:

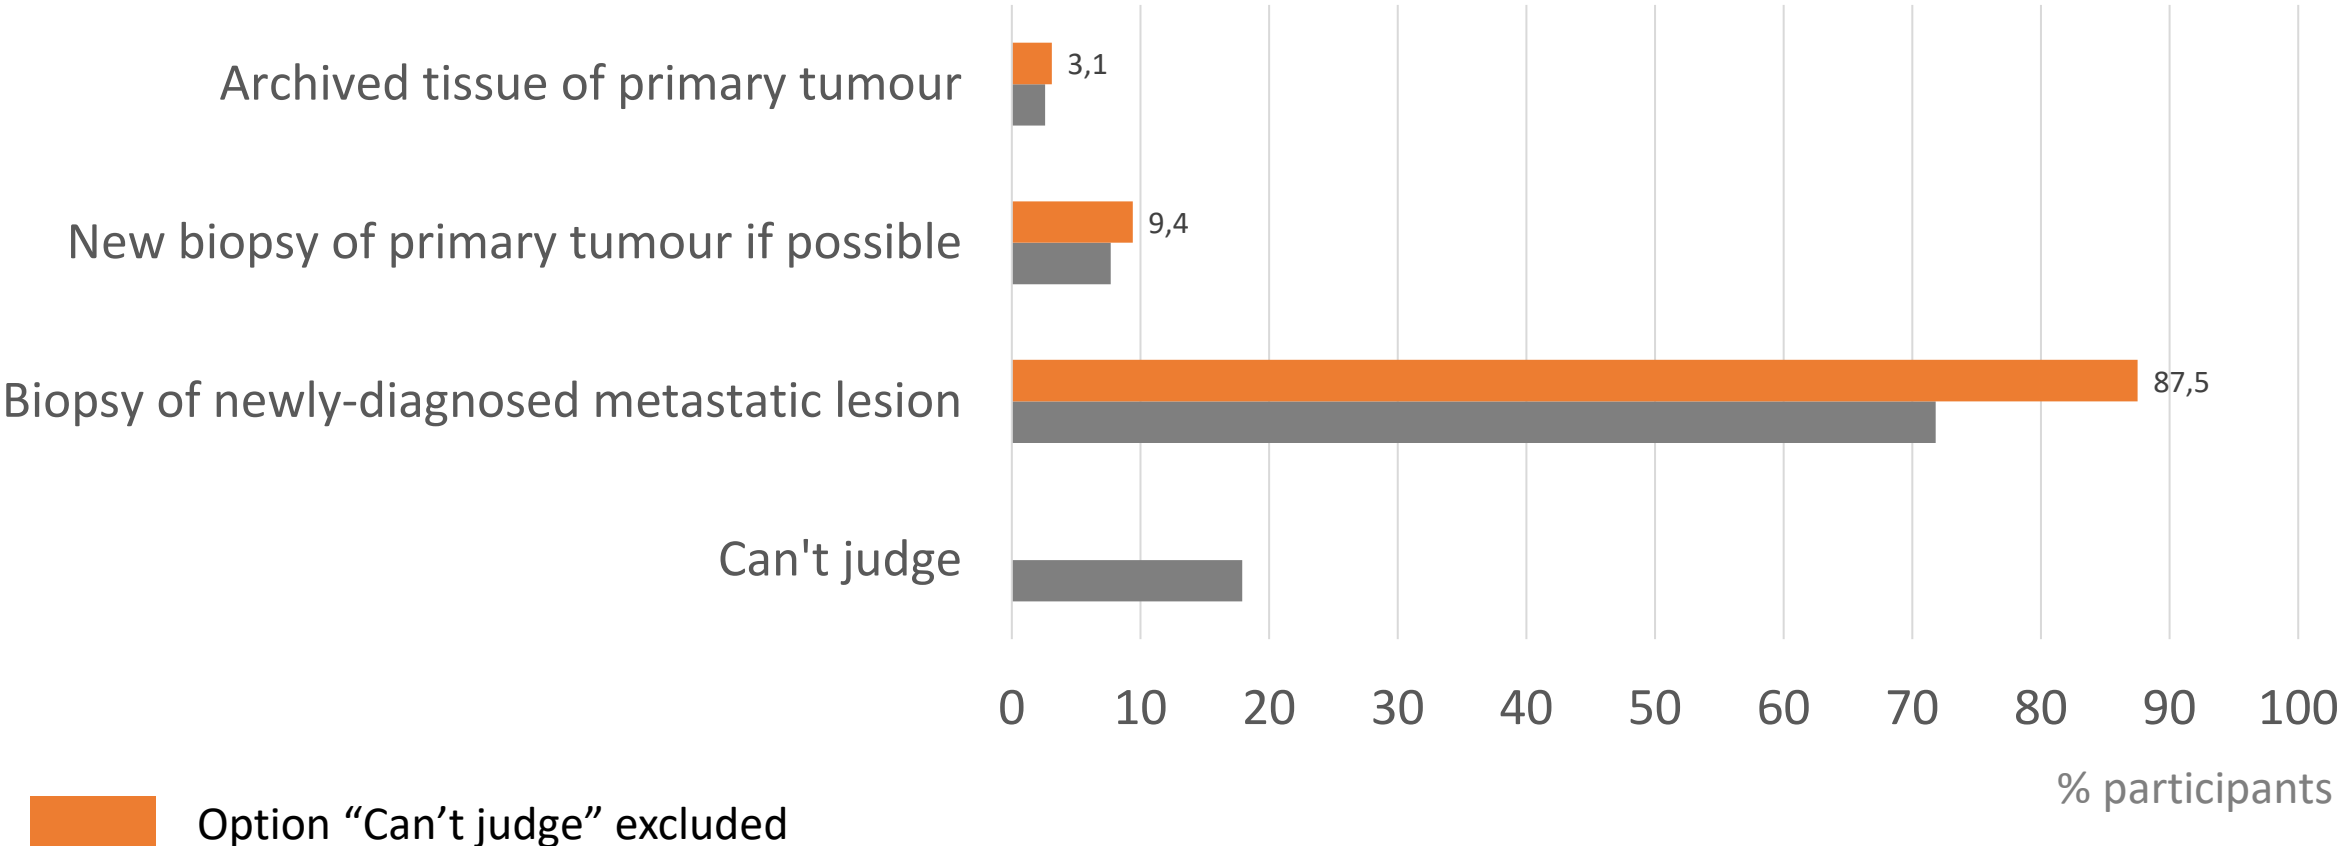

# Scenario 11

Progression to mCRPC

## Question 22

How appropriate is genetic testing to identify actionable variants in a mCRPC patient?

| Options                  | Appropriateness<br>(median score) <sup>1</sup> | Can't judge<br>(%) <sup>2</sup> |
|--------------------------|------------------------------------------------|---------------------------------|
| Germline genetic testing | 4.0                                            | 21                              |
| Tumour genetic testing   | 8.5                                            | 18                              |

<sup>1</sup> Score on a 9-point scale: 1-3 (very) unimportant (red), 4-6 uncertain or disagreement (yellow), 7-9 (very) important (green)

<sup>2</sup> Total number of respondents=39

# Question 23

From a clinical perspective, how appropriate do you consider tumour genetic testing to identify actionable variants in patients with mCRPC if they have the following characteristics:

| Characteristic                            | Appropriateness (median score) <sup>1</sup> | Can't judge (%) <sup>2</sup> |
|-------------------------------------------|---------------------------------------------|------------------------------|
| Young age of patient                      | 8.0                                         | 28                           |
| Stage at initial diagnosis: mHSPC         | 7.0                                         | 36                           |
| Stage at initial diagnosis: localised Pca | 6.0                                         | 36                           |
| Presence of visceral or liver metastases  | 8.0                                         | 33                           |
| Only bone metastases (high-volume)        | 7.0                                         | 36                           |
| Duration response to ADT <1 jaar          | 7.0                                         | 39                           |
| Duration response to ADT >1 jaar          | 6.0                                         | 39                           |
| Gleason score 8-10                        | 8.0                                         | 36                           |
| Primary resistance to therapy             | 7.0                                         | 44                           |
| Presence of PCa in family                 | 7.0                                         | 31                           |
| Presence of familial PCa                  | 8.0                                         | 28                           |

<sup>1</sup> Score on a 9-point scale: 1-3 inappropriate (red), 4-6 uncertain or disagreement (yellow), 7-9 appropriate (green)

<sup>2</sup> Total number of respondents=39

## Question 24

How important is further germline genetic testing in a mCRPC patient having a BRCA1/2 tumour (L)PV?

|                          | Importance<br>(median score) <sup>1</sup> | Can't judge<br>(%) <sup>2</sup> |
|--------------------------|-------------------------------------------|---------------------------------|
| Germline genetic testing | 8.0                                       | 15                              |

<sup>1</sup> Score on a 9-point scale: 1-3 (very) unimportant (red), 4-6 uncertain or disagreement (yellow), 7-9 (very) important (green)

<sup>2</sup> Total number of respondents=39



## Question 25

In a patient with mCRPC, fit enough to receive several therapy lines and not yet treated with novel hormonal agents (NHA) or chemotherapy in the mHSPC, I would recommend tumour genetic testing in daily clinical practice:

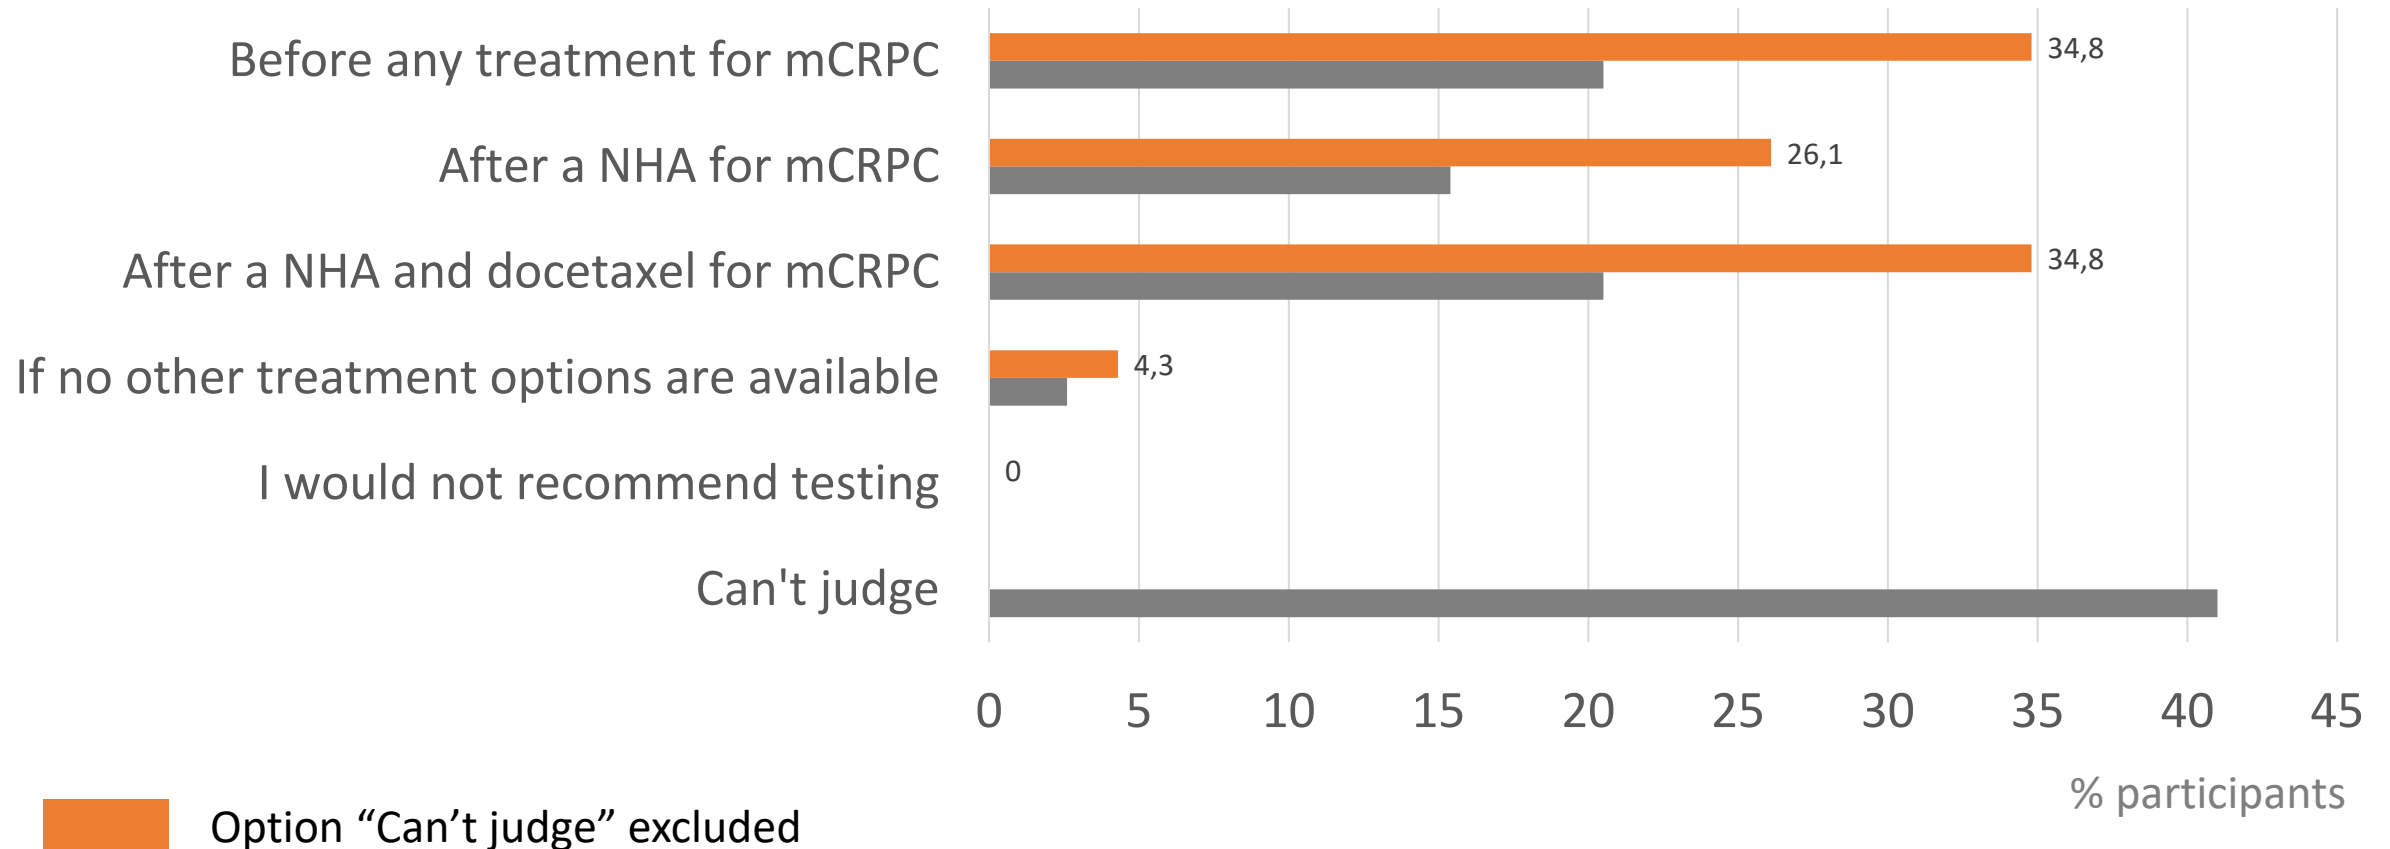

## Question 26

In a patient with mCRPC, fit enough to receive several therapy lines and not yet treated with novel hormonal agents (NHA) or chemotherapy in the mHSPC, I would recommend tumour genetic testing in an experimental setting:

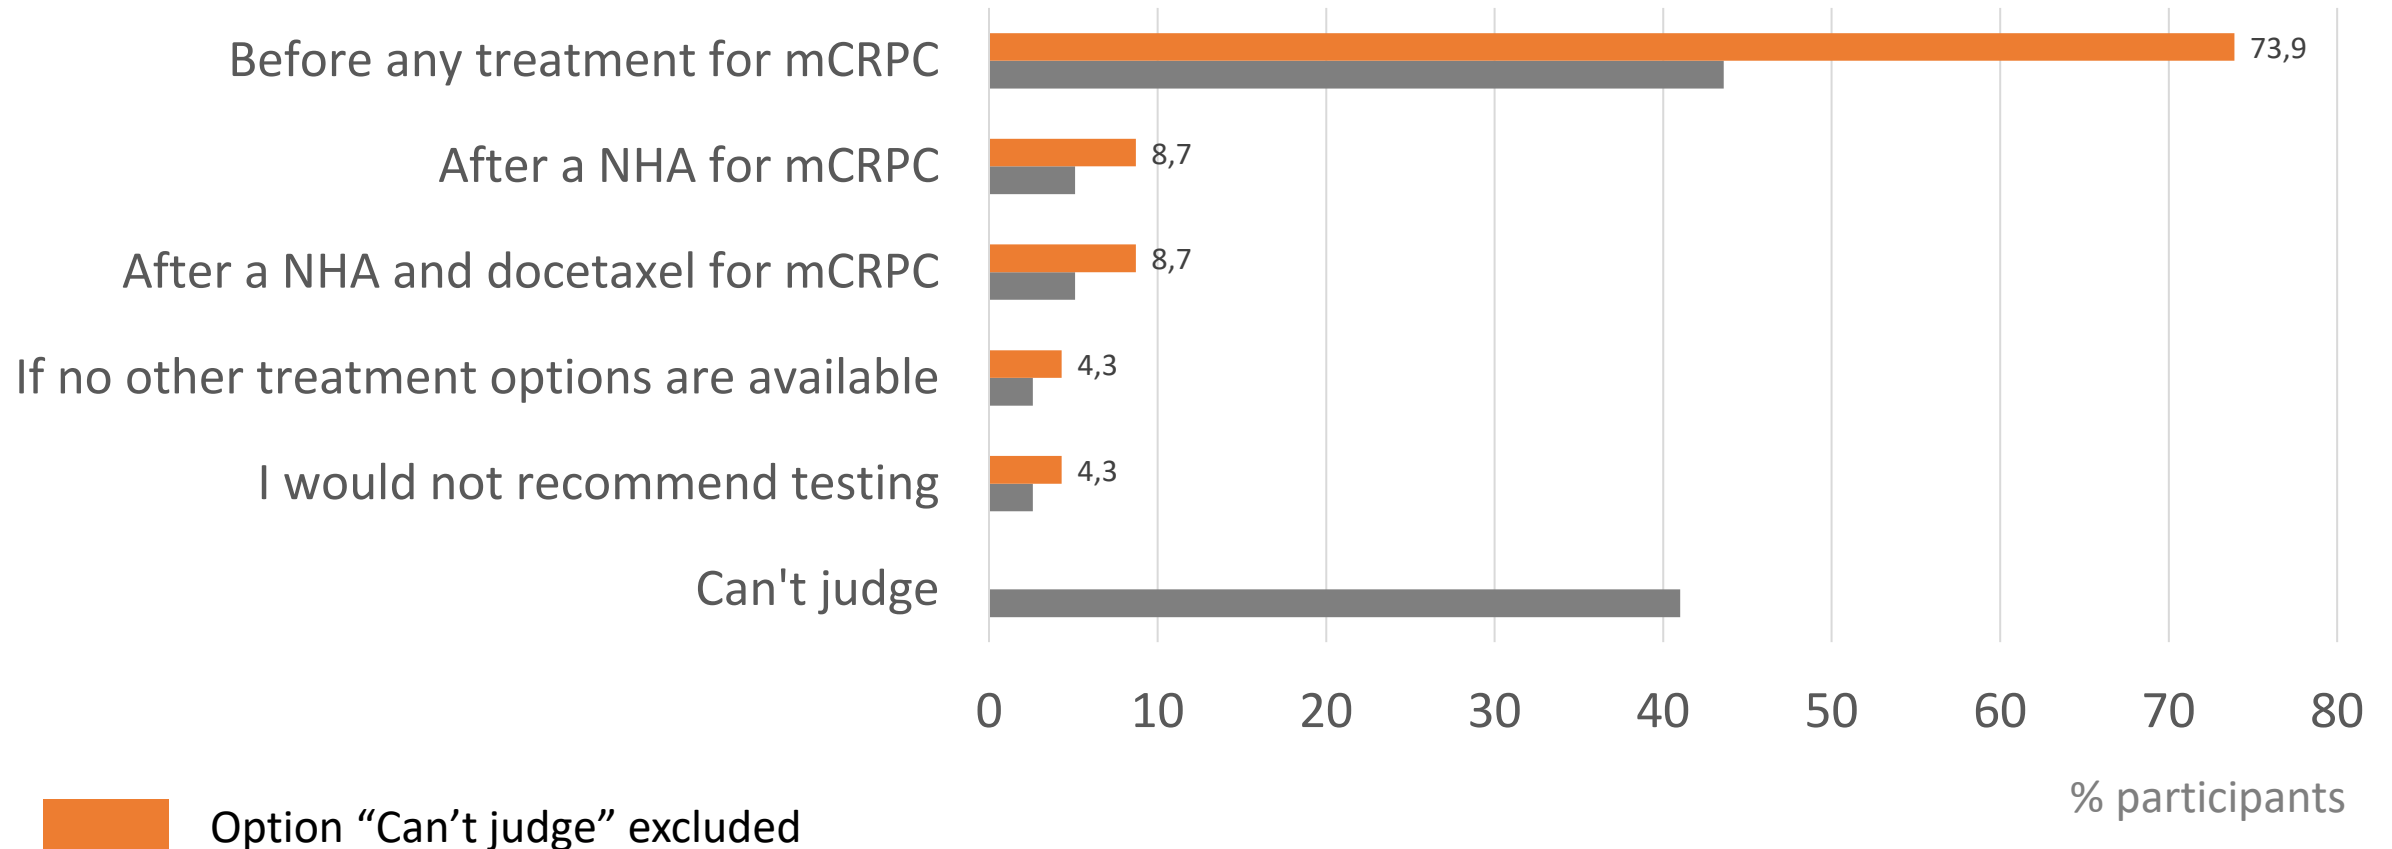

## Question 27

How appropriate do you consider the following tissue sources if tumour genetic testing is recommended for an mCRPC patient?

| Source                                           | Importance<br>(median score) <sup>1</sup> | Can't judge<br>(%) <sup>2</sup> |
|--------------------------------------------------|-------------------------------------------|---------------------------------|
| Archived diagnostic tissue of the primary tumour | 6.0                                       | 18                              |
| Most recent archived tumour tissue               | 7.0                                       | 18                              |
| New biopsy of prostate if feasible               | 7.0                                       | 23                              |
| New biopsy bone metastasis                       | 8.0                                       | 21                              |
| New biopsy lymph node metastasis                 | 8.0                                       | 21                              |
| New biopsy visceral metastasis                   | 8.0                                       | 23                              |

<sup>1</sup> Score on a 9-point scale: 1-3 (very) unimportant (red), 4-6 uncertain or disagreement (yellow), 7-9 (very) important (green)

<sup>2</sup> Total number of respondents=39

# Question 28

What are the minimum requirements for tumour percentage of an archived or newly-obtained biopsy for performing somatic tumour testing?

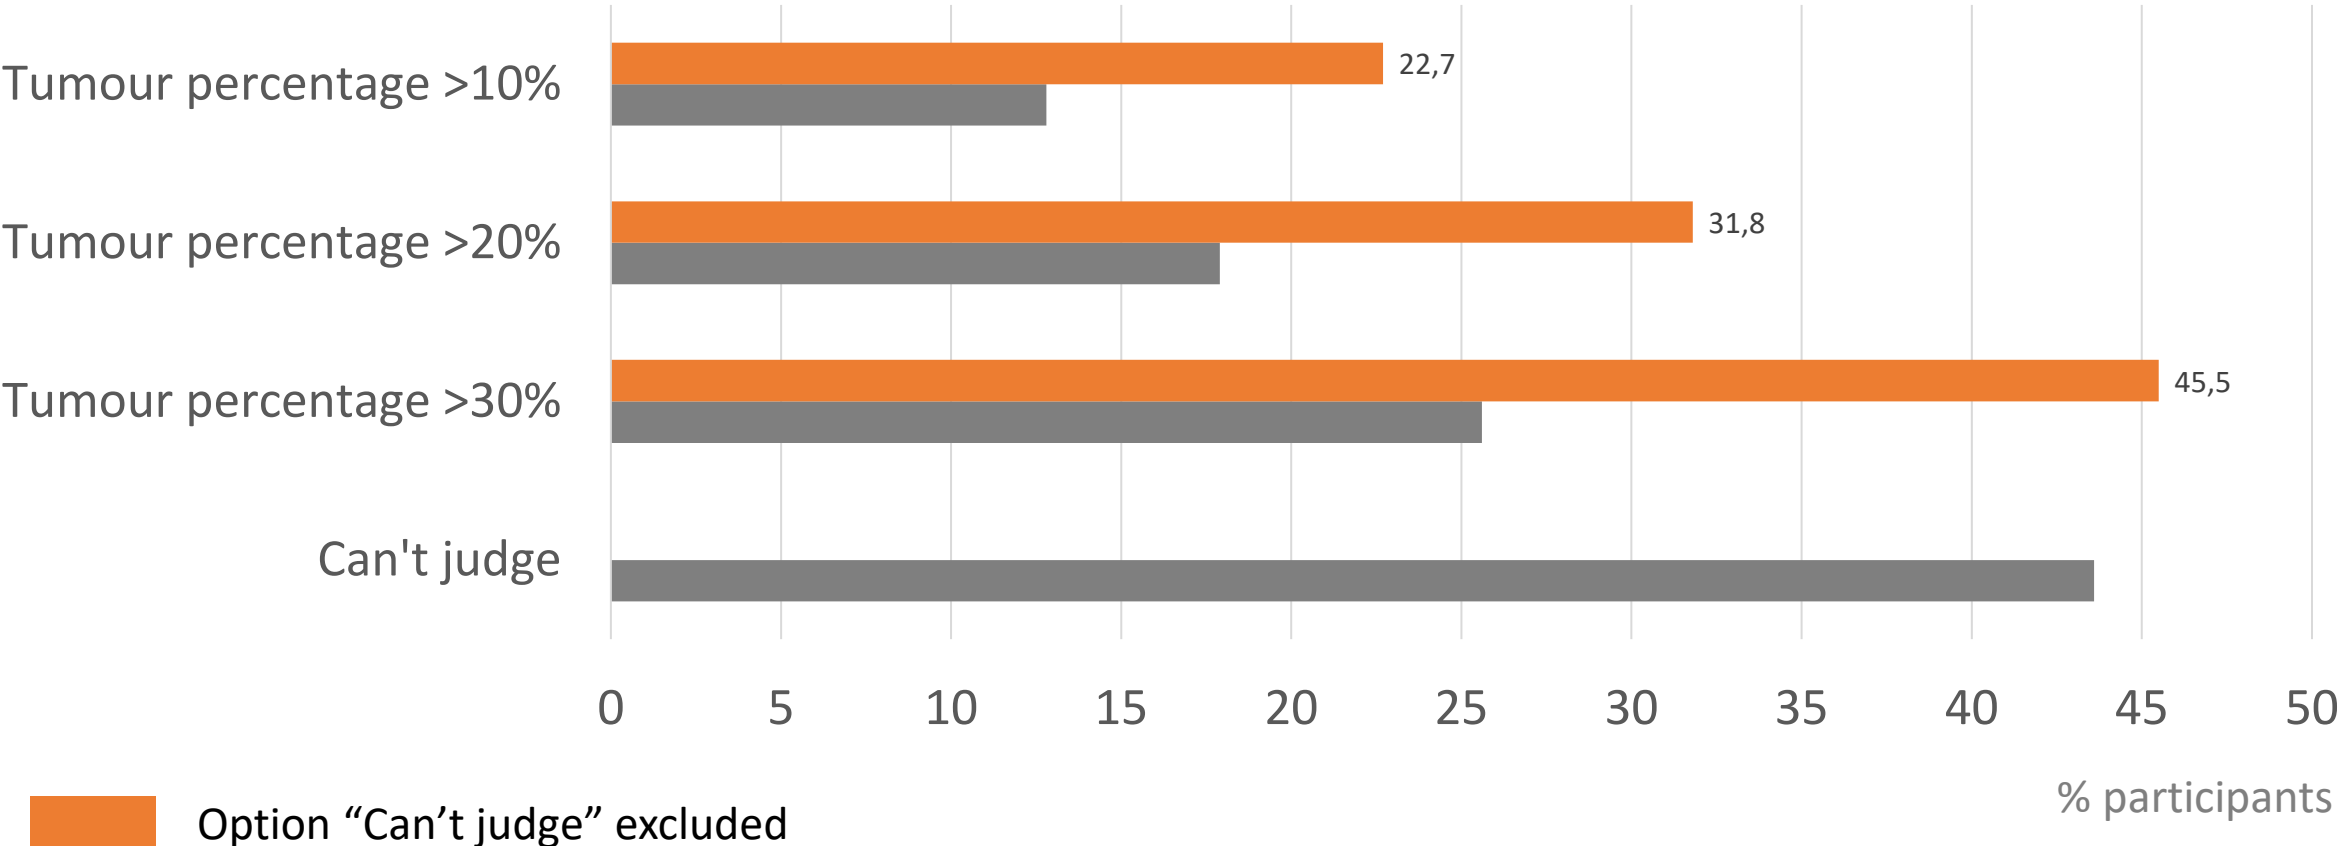

# Question 29

What are the minimum requirements for biopsy age if archived tissue is used to perform somatic tumour testing?

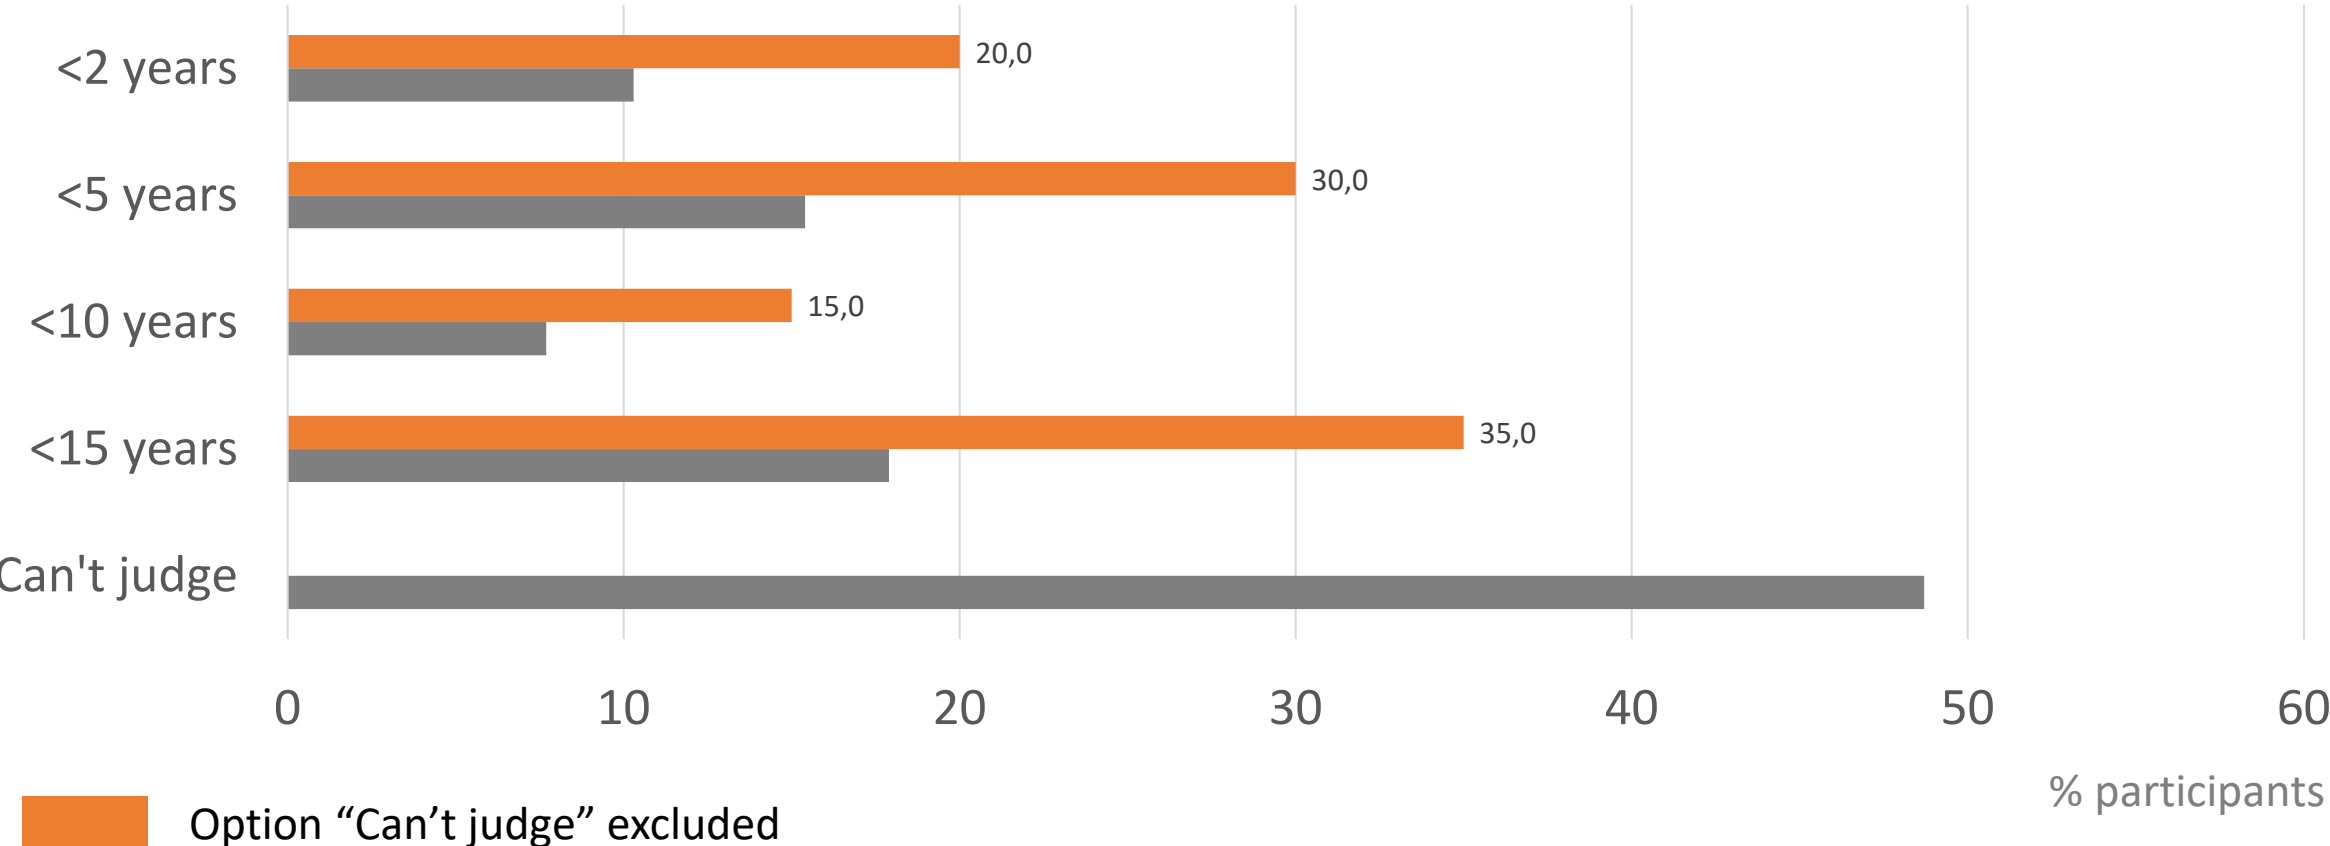

# Question 30

Which are the most relevant gene panels to use for somatic testing in a patient with mCRPC for clinical decision making in daily practice? [multiple answers allowed]

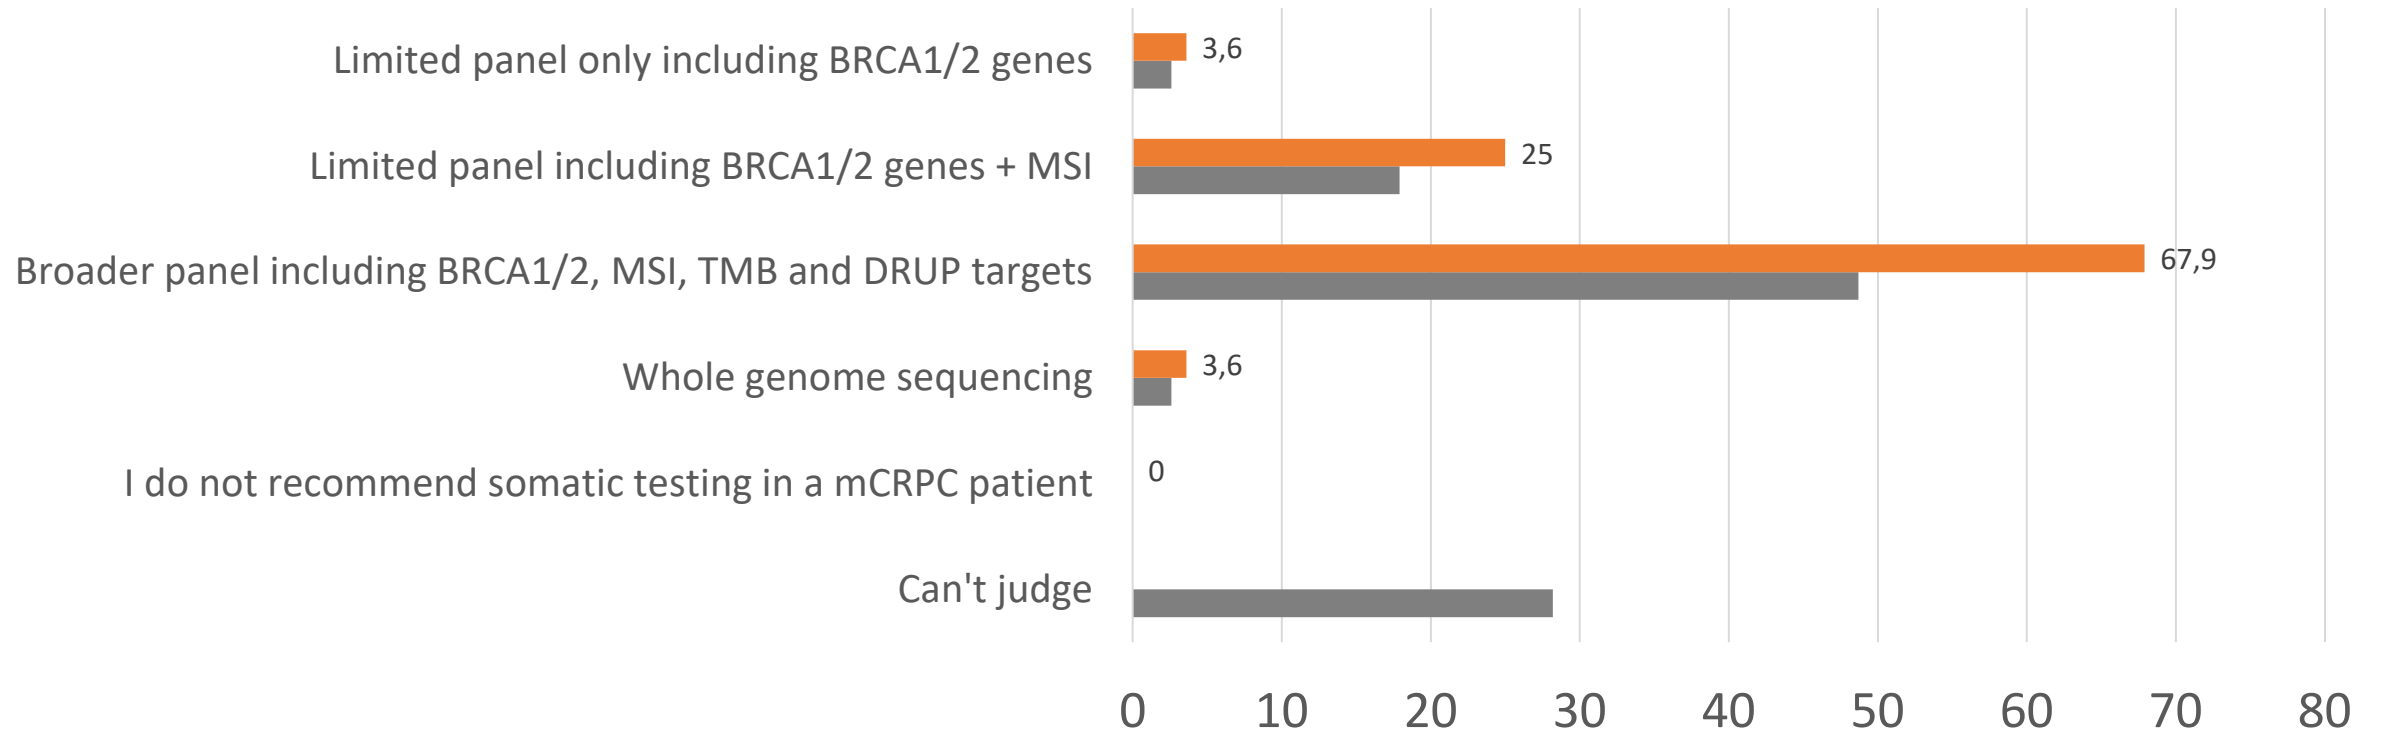

Option "Can't judge" excluded

% participants

# Question 31

Which are the most relevant gene panels to use for somatic testing in a patient with mCRPC for research purposes? [multiple answers allowed]

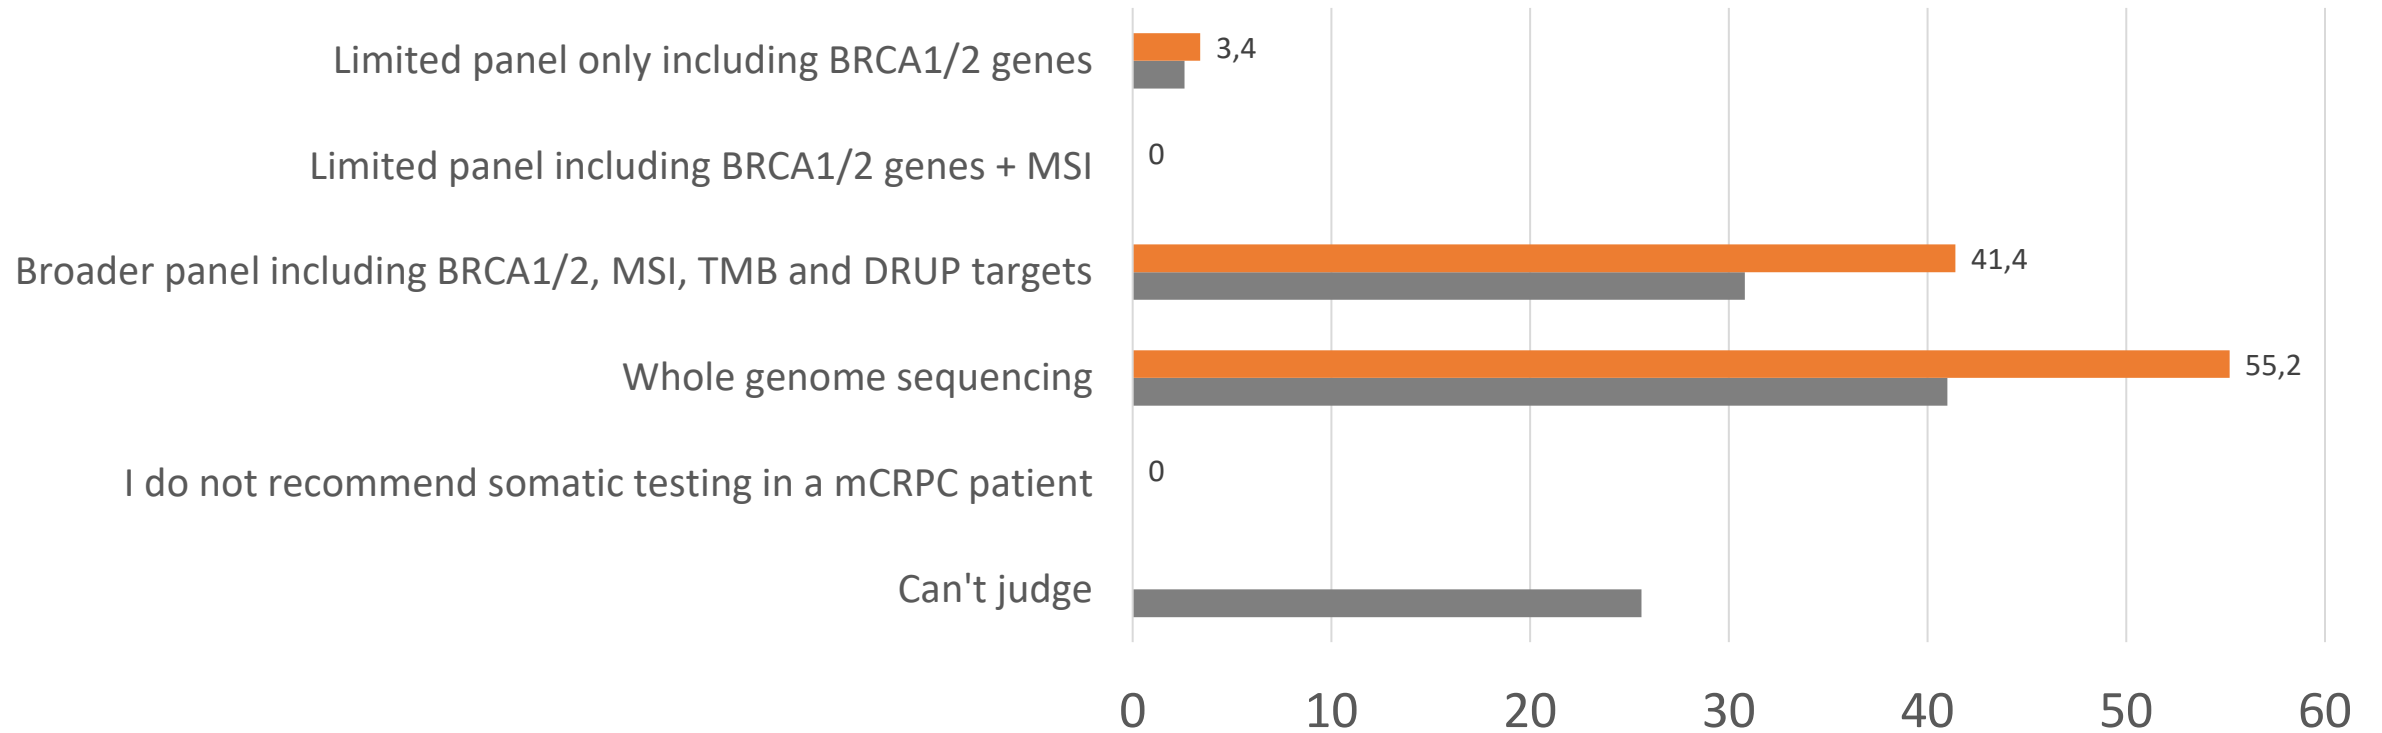

Option "Can't judge" excluded

% participants

# Question 32

Where should tumour genetic testing be carried out?

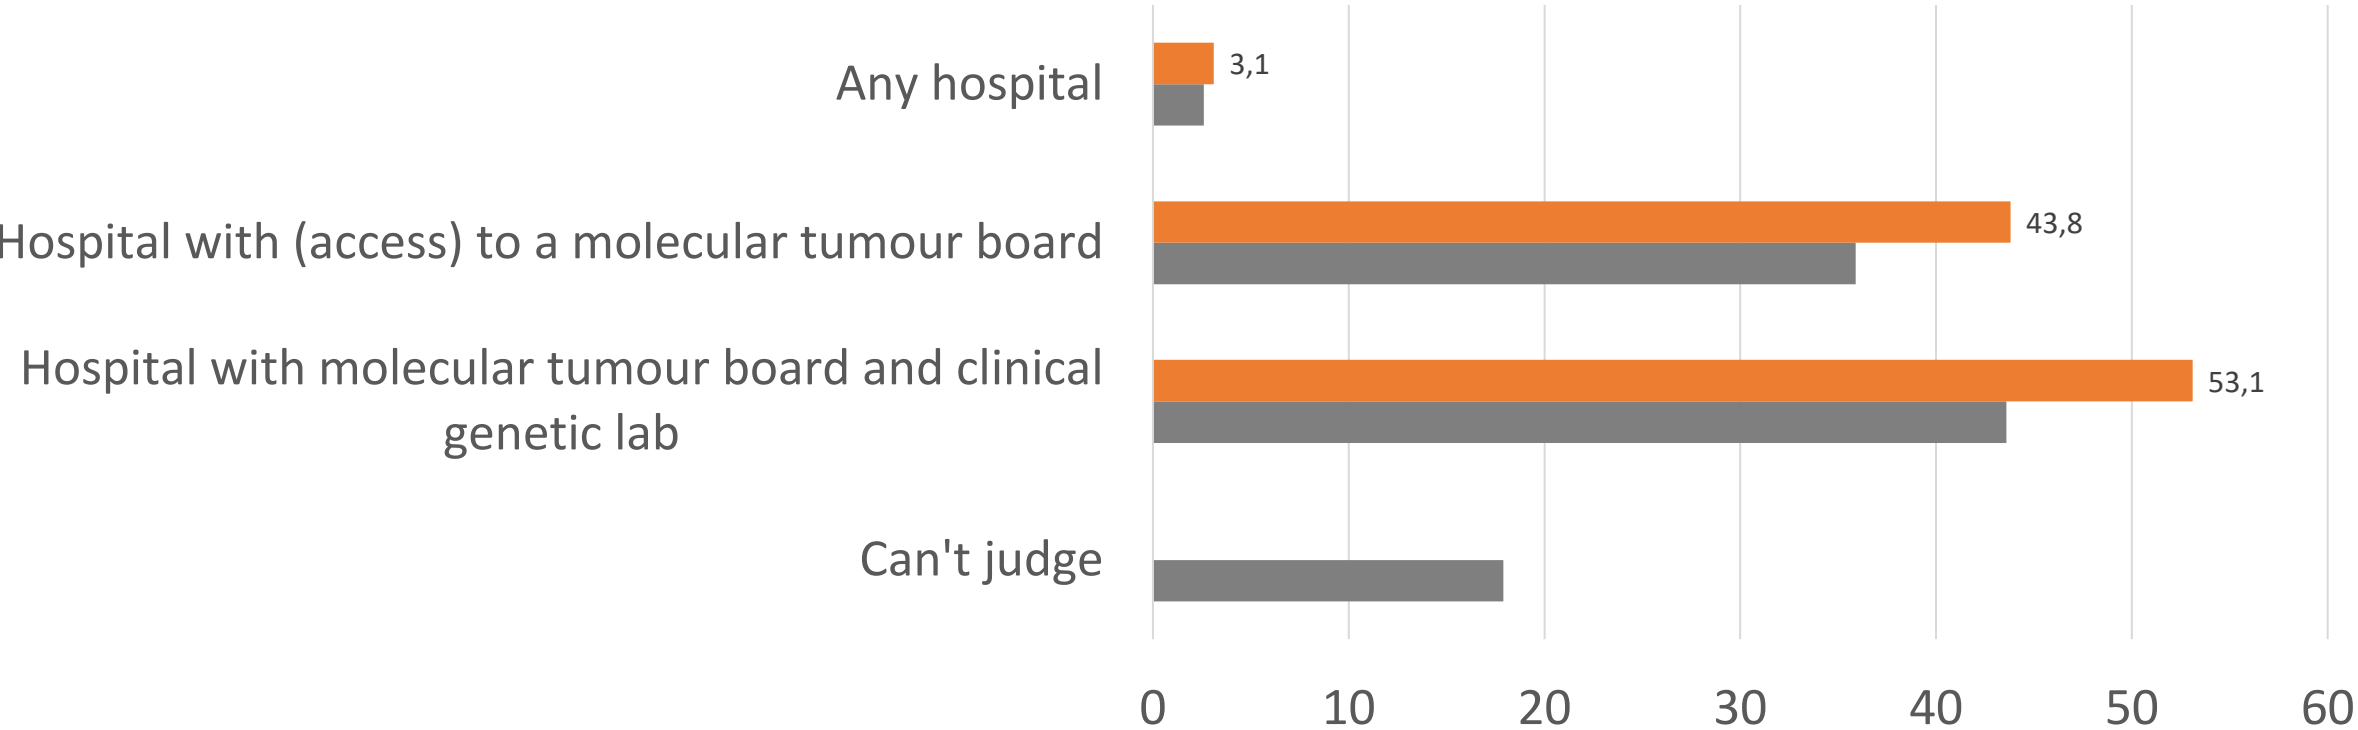

Option "Can't judge" excluded

% participants



# Question 33

When would you use a PARPi in a patient with mCRPC and a BRCA1/2 germline and/or tumour (L)PV?

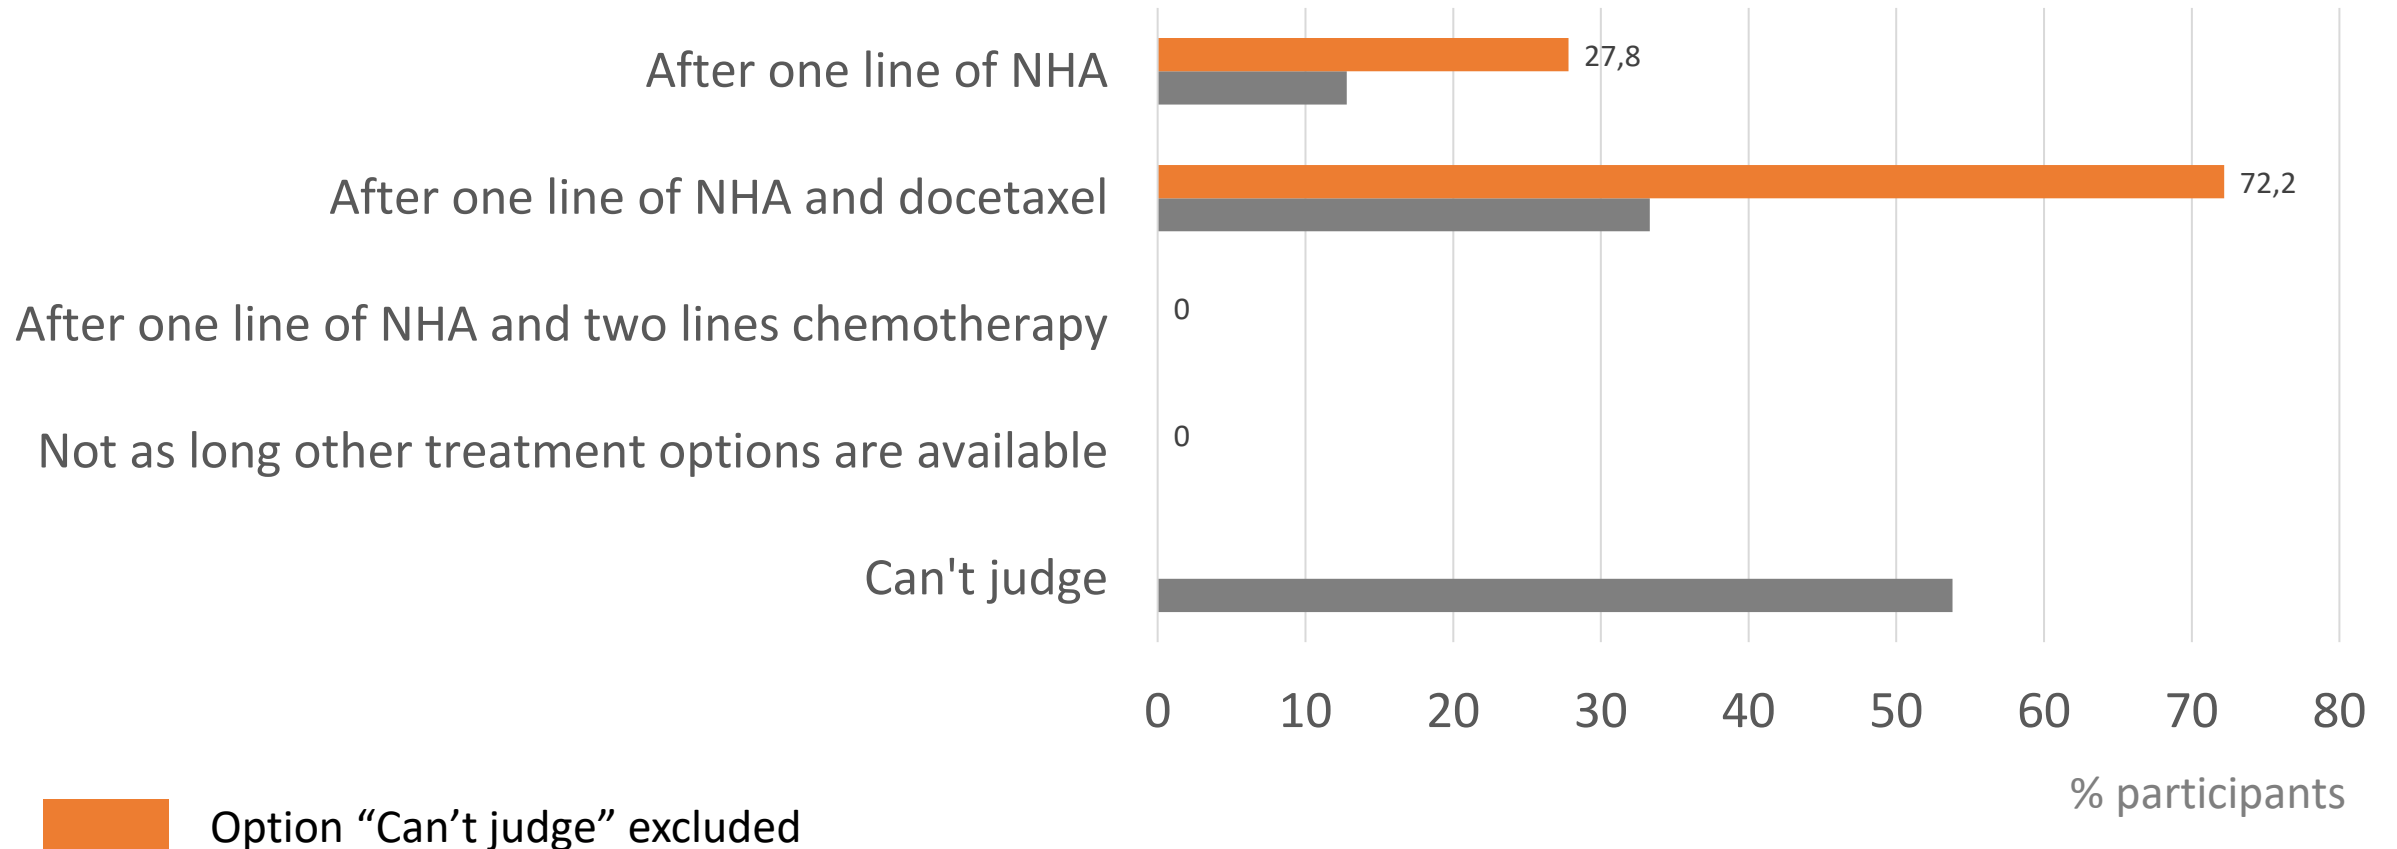

# Question 34

When would you use an immune checkpoint inhibitor in a patient with mCRPC and a MMR (L)PV or MSI?

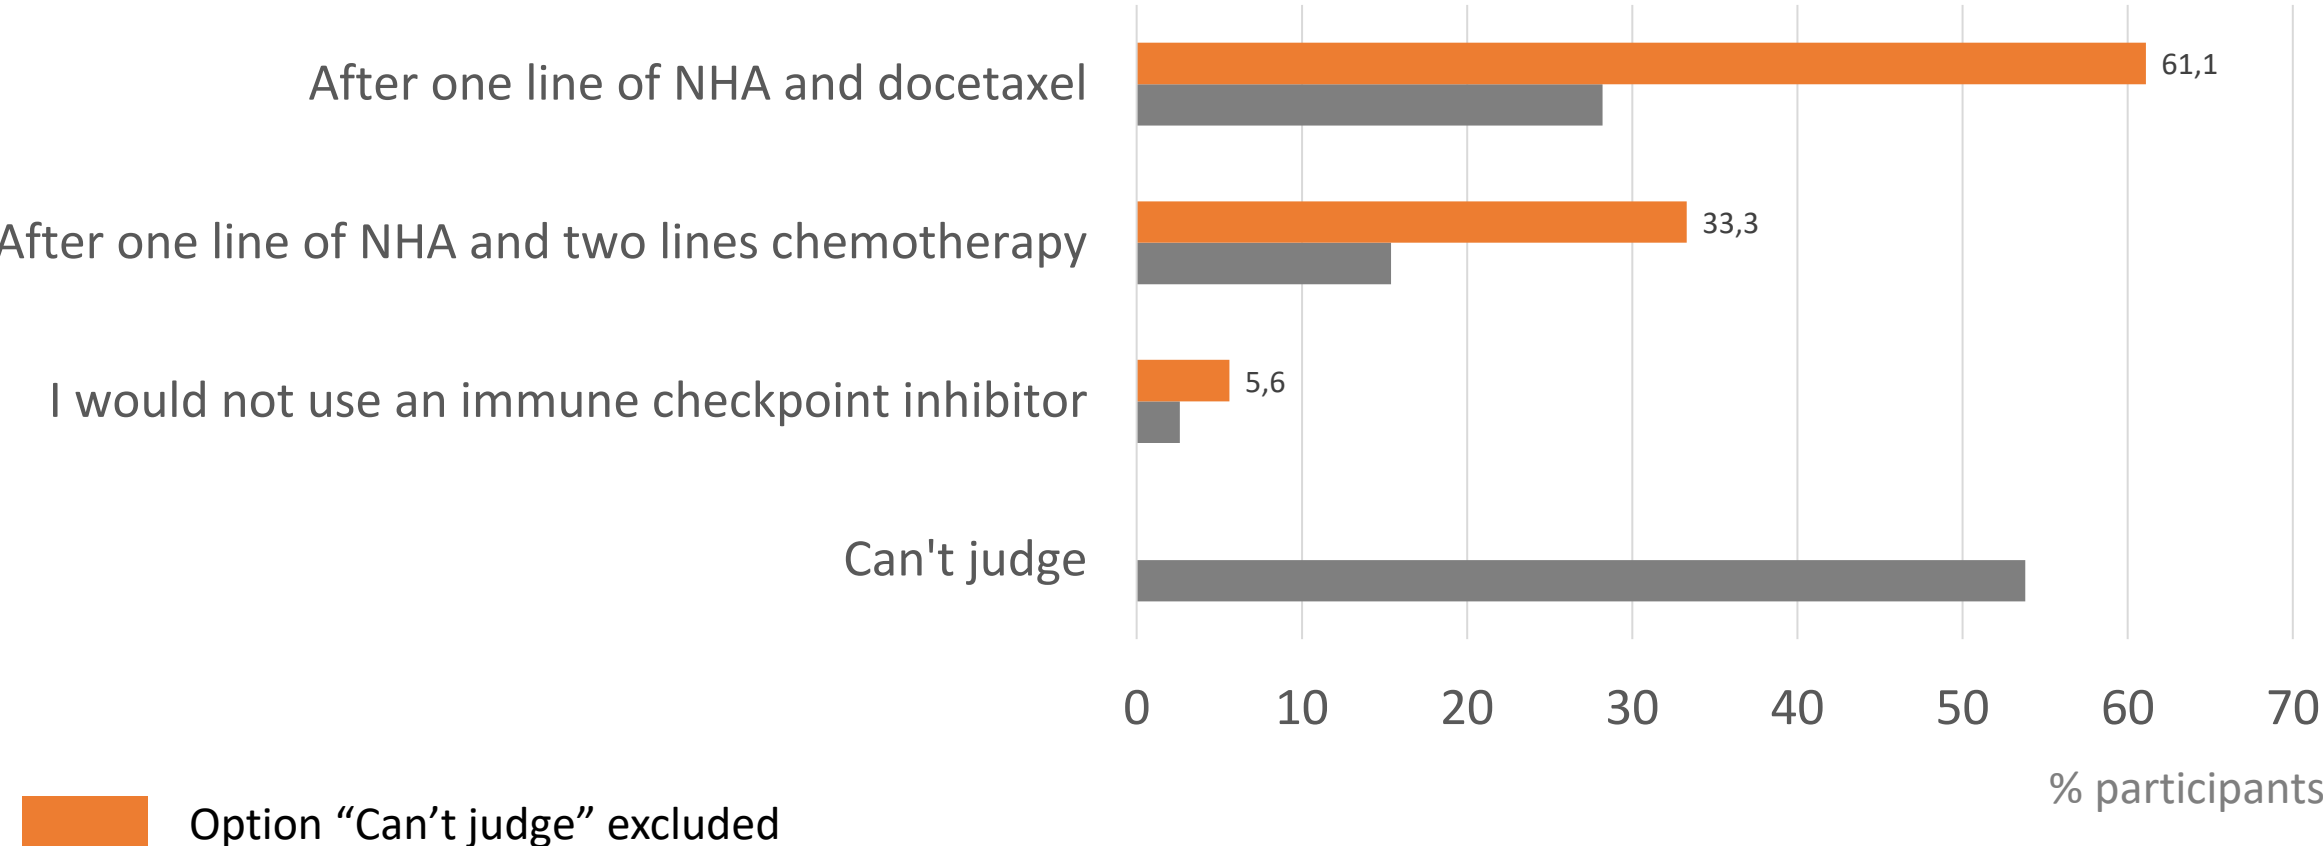

# Question 35

Do you recommend platinum-based chemotherapy to patients with mCRPC and a BRCA1/2 tumour and/or germline (L)PV before a possible treatment with a PARPi?

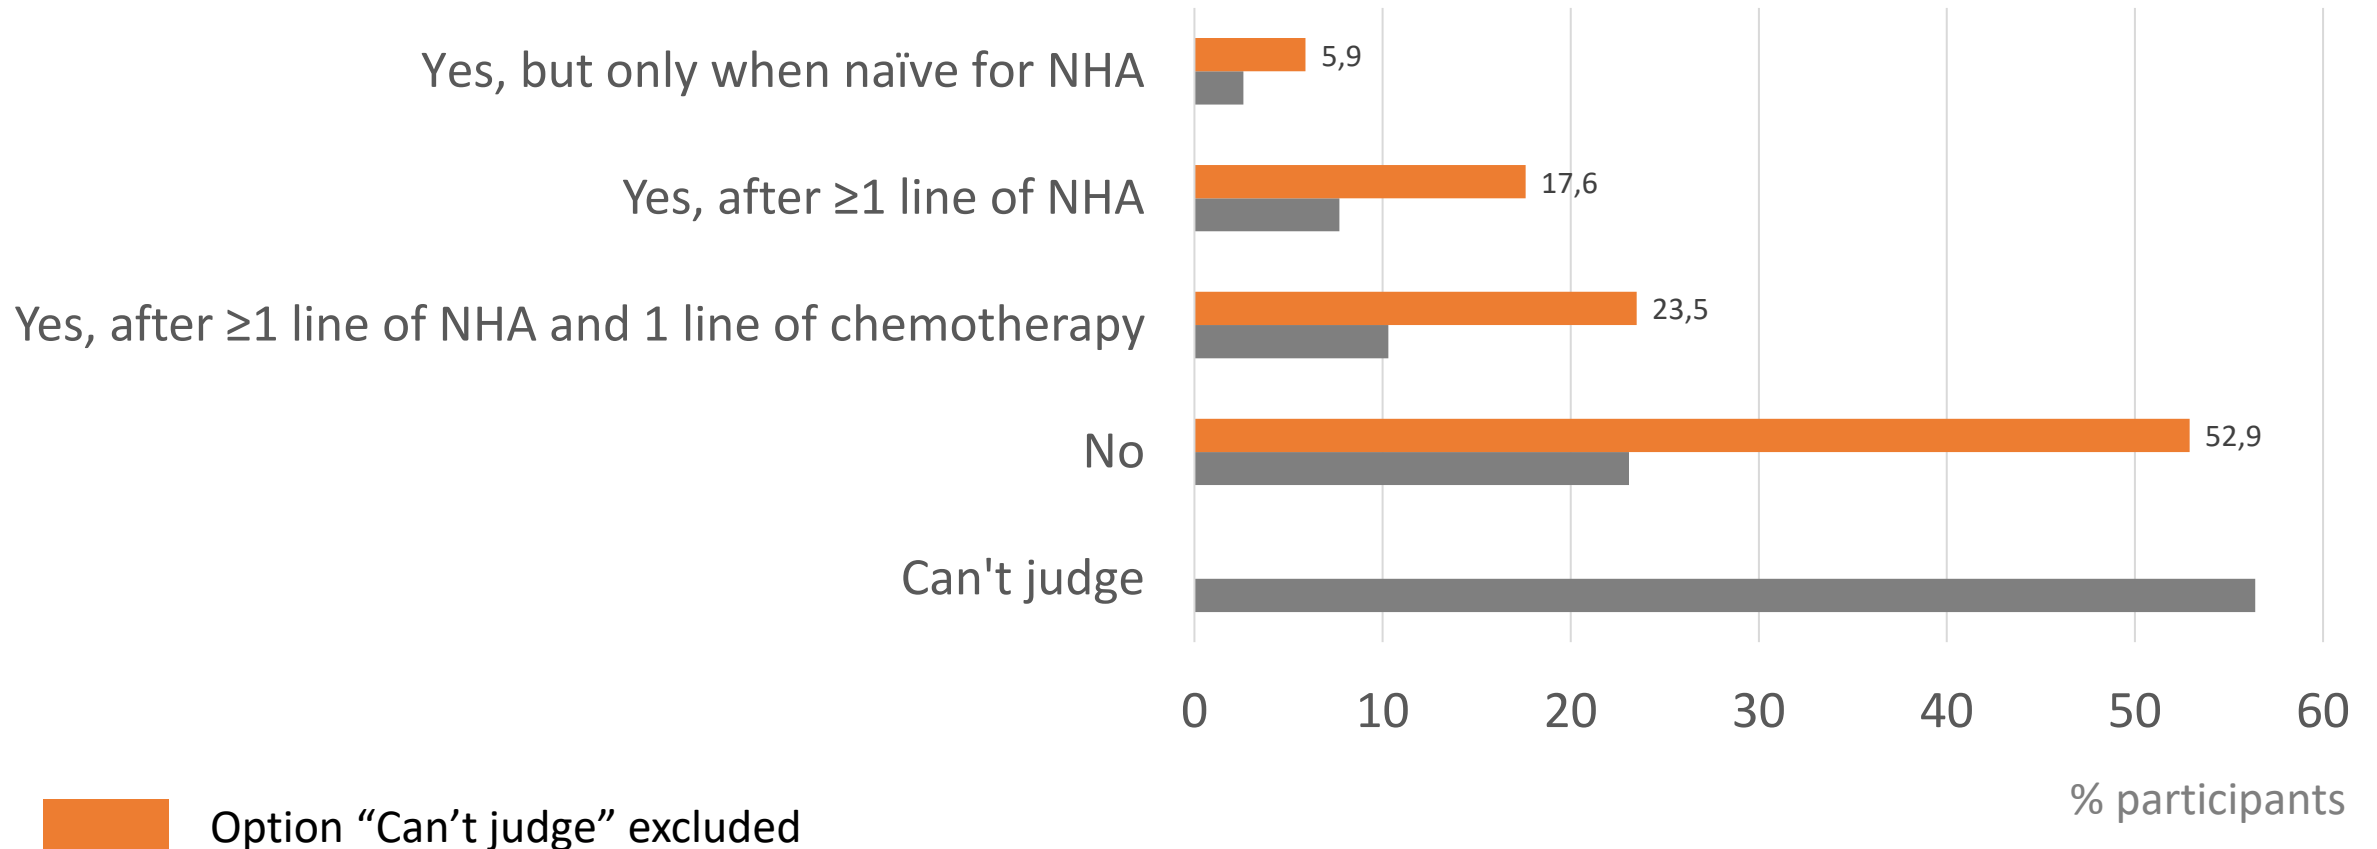

# Question 36

Do you recommend platinum-based chemotherapy to patients with mCRPC and a BRCA1/2 tumour and/or germline (L)PV after progression with a PARPi?

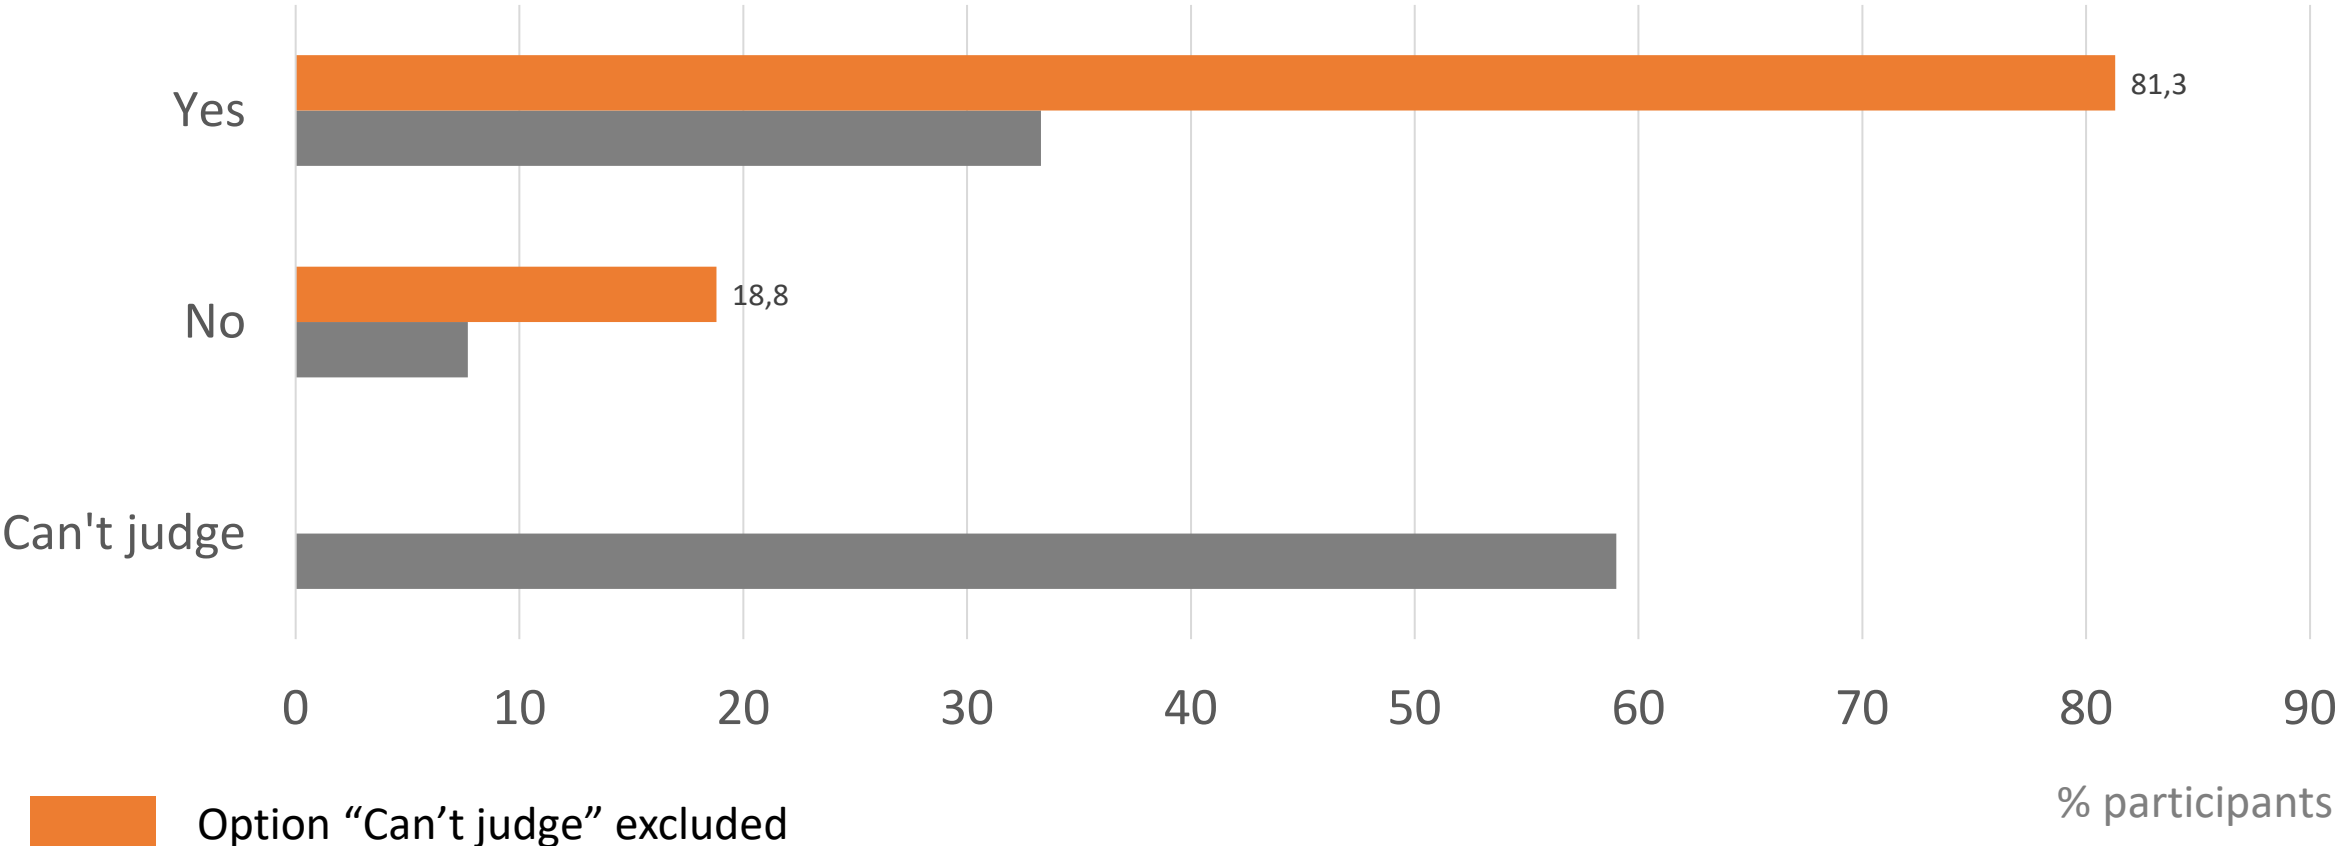

Supplement: mmc1.pdf [file mmc1.pdf]
